# Supplementary material for: Synthesis and Antiproliferative Activity of 2,6-Disubstituted Imidazo[4,5-b]pyridines Prepared by Suzuki Cross Coupling
Source: MDPI journal article supplement (doi:10.3390/molecules28207208), 2023-10-21
Supplement: s1 [file s1]

**Synthesis and antiproliferative activity of 2,6-disubstituted imidazo[4,5-*b*]pyridines  
prepared by Suzuki cross coupling**

Ida Boček Pavlinac<sup>a</sup>, Mirna Dragić<sup>a</sup>, Leentje Persoons<sup>b</sup>, Dirk Daelemans<sup>b</sup> and Marijana Hranjec<sup>a\*</sup>

<sup>a</sup>Faculty of Chemical Engineering and Technology, University of Zagreb, Zagreb, Croatia;

<sup>b</sup>KU Leuven Department of Microbiology, Immunology and Transplantation, Laboratory of Virology and Chemotherapy, Rega Institute, Leuven, Belgium

**Supporting Information**

**Contents**

**1. NMR spectra** (Figures S1-S36)

**2. Optimization of Suzuki coupling** (Figures S37-S38)

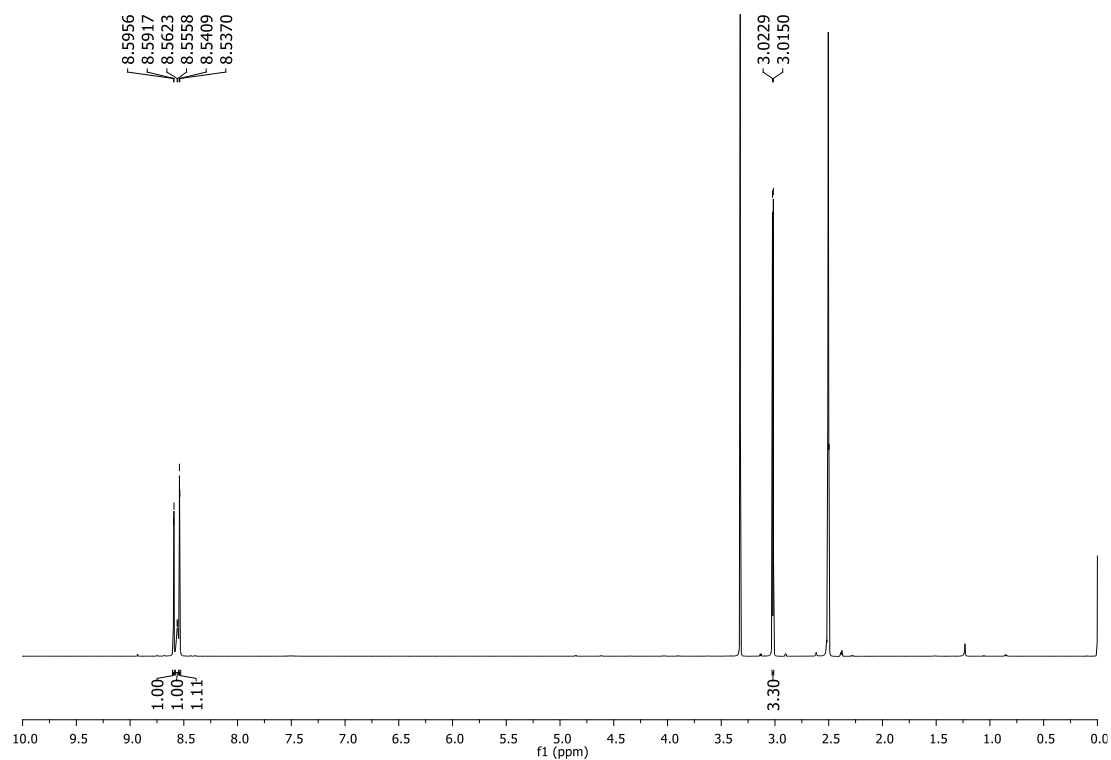

**Figure S1.** <sup>1</sup>H NMR spectrum (DMSO-*d*<sub>6</sub>, 600 MHz) of 5-bromo-*N*-methyl-3-nitropyridin-2-amine **2**

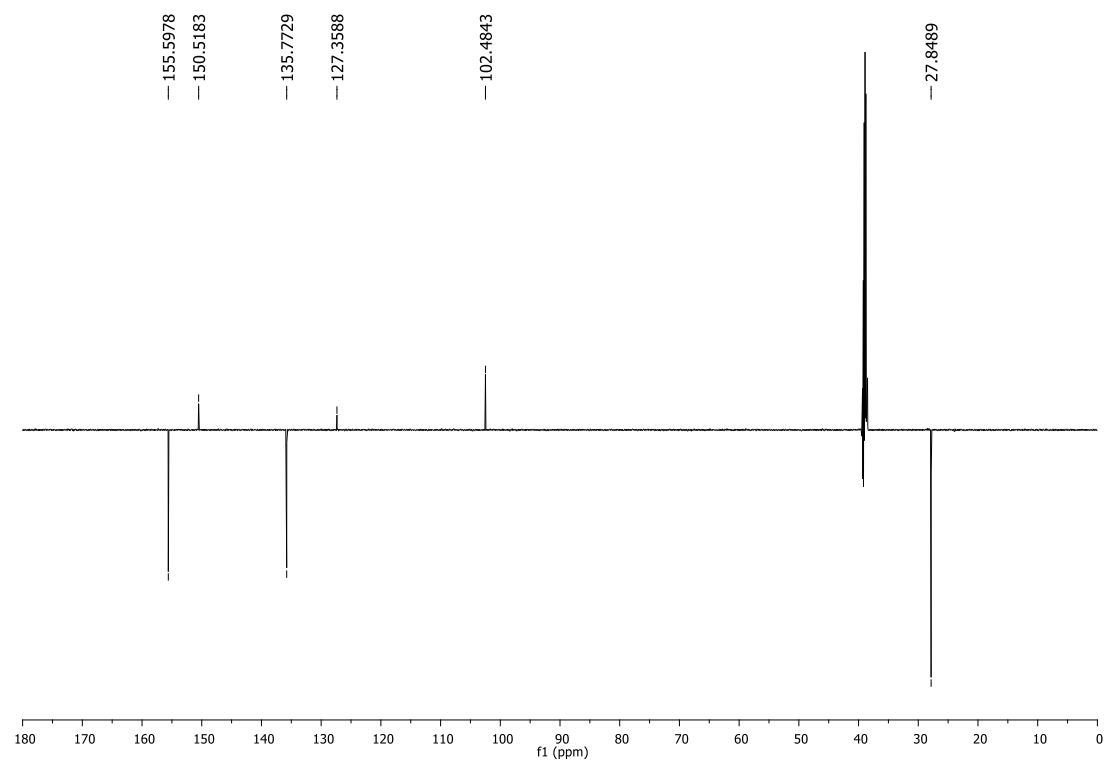

**Figure S2.** <sup>13</sup>C NMR spectrum (DMSO-*d*<sub>6</sub>, 151 MHz) of 5-bromo-*N*-methyl-3-nitropyridin-2-amine **2**

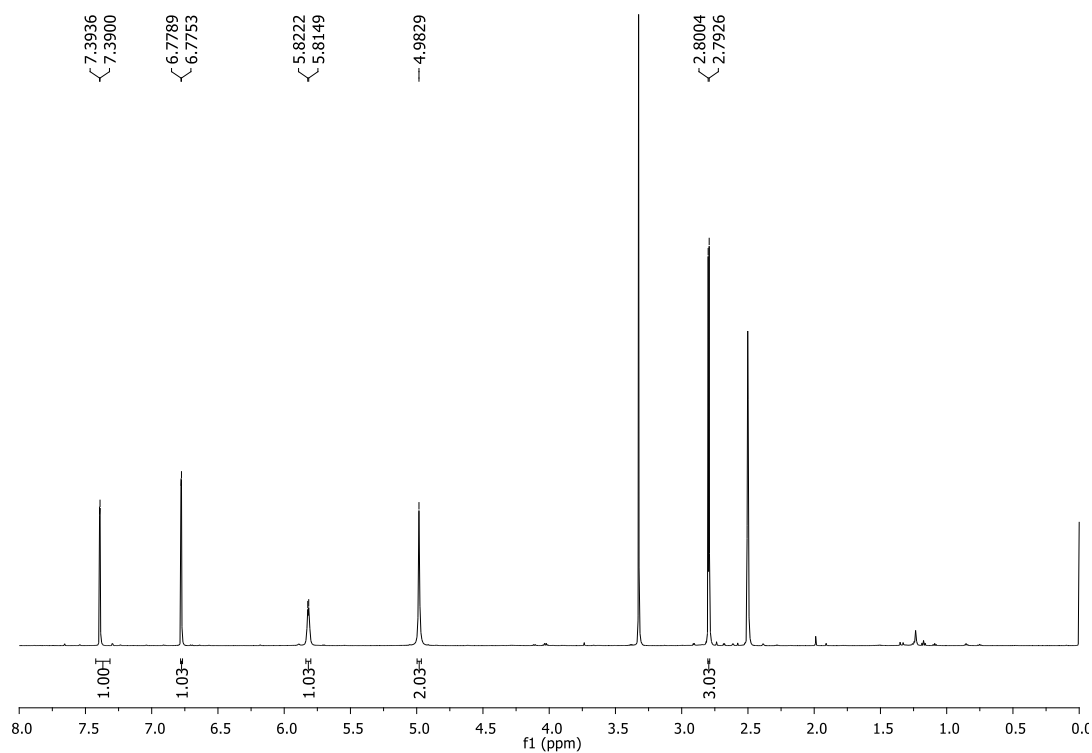

**Figure S3.** <sup>1</sup>H NMR spectrum (DMSO-*d*<sub>6</sub>, 600 MHz) of 5-bromo-*N*<sup>2</sup>-methylpyridine-2,3-diamine **4**

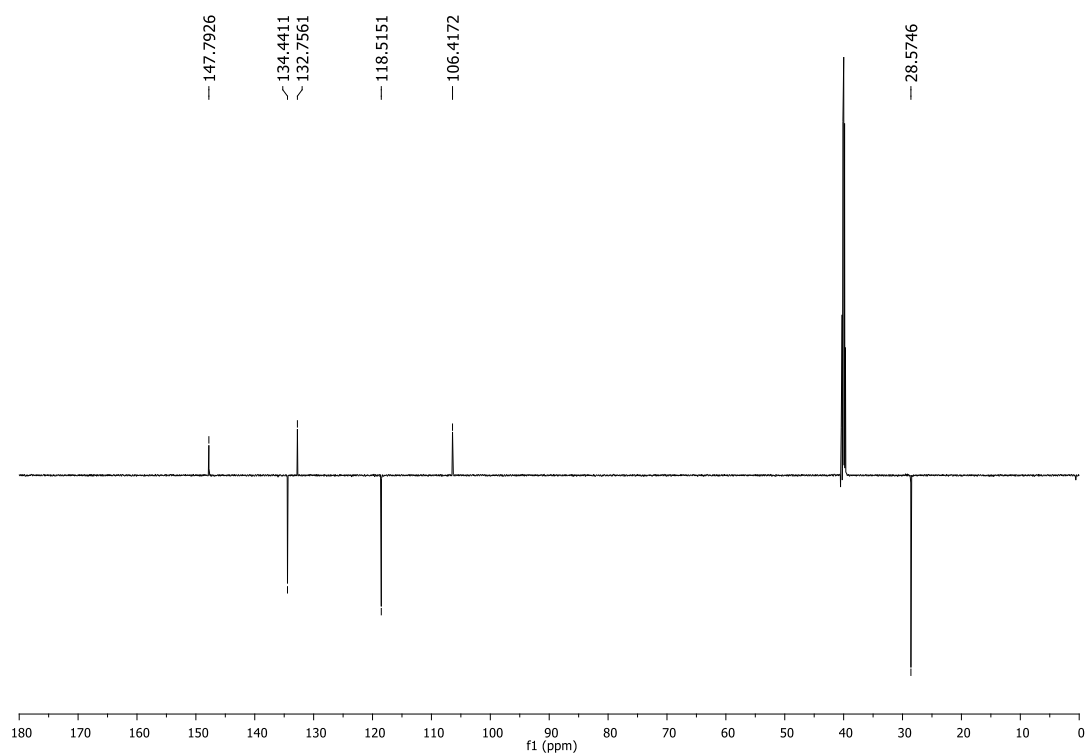

**Figure S4.** <sup>13</sup>C NMR spectrum (DMSO-*d*<sub>6</sub>, 151 MHz) of 5-bromo-*N*<sup>2</sup>-methylpyridine-2,3-diamine **4**

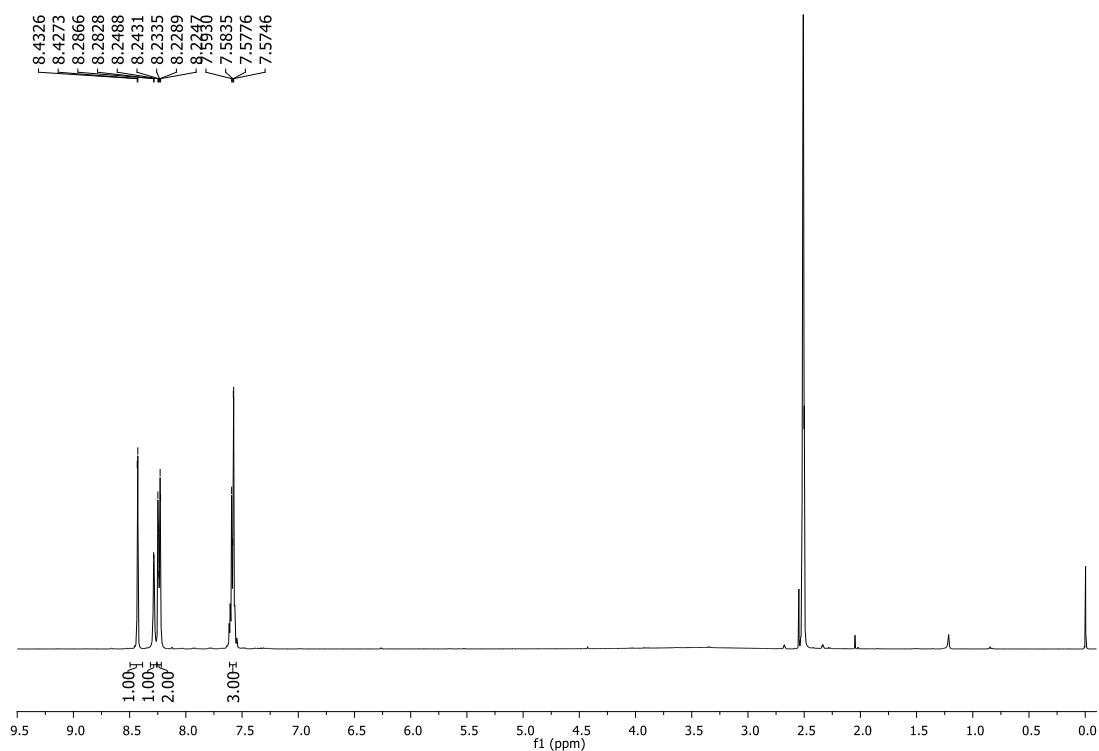

**Figure S5.** <sup>1</sup>H NMR spectrum (DMSO-*d*<sub>6</sub>, 400 MHz) of 6-bromo-2-phenyl-3*H*-imidazo[4,5-*b*]pyridine **5**

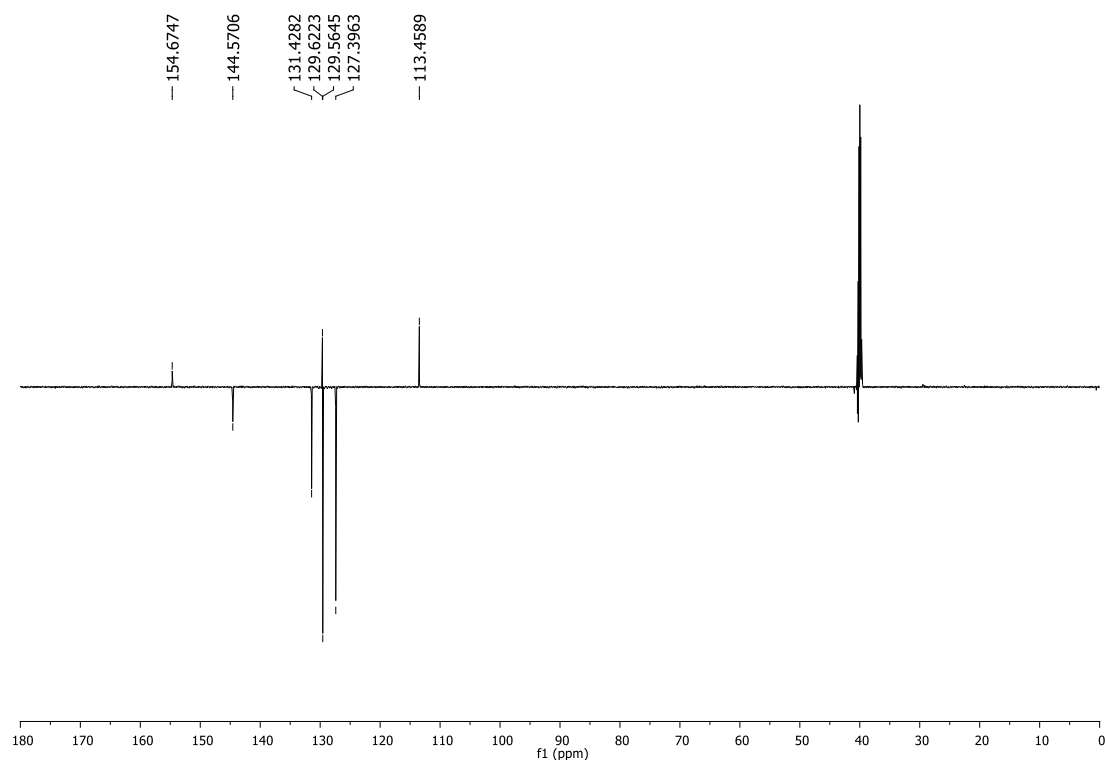

**Figure S6.** <sup>13</sup>C NMR spectrum (DMSO-*d*<sub>6</sub>, 151 MHz) of 6-bromo-2-phenyl-3*H*-imidazo[4,5-*b*]pyridine **5**

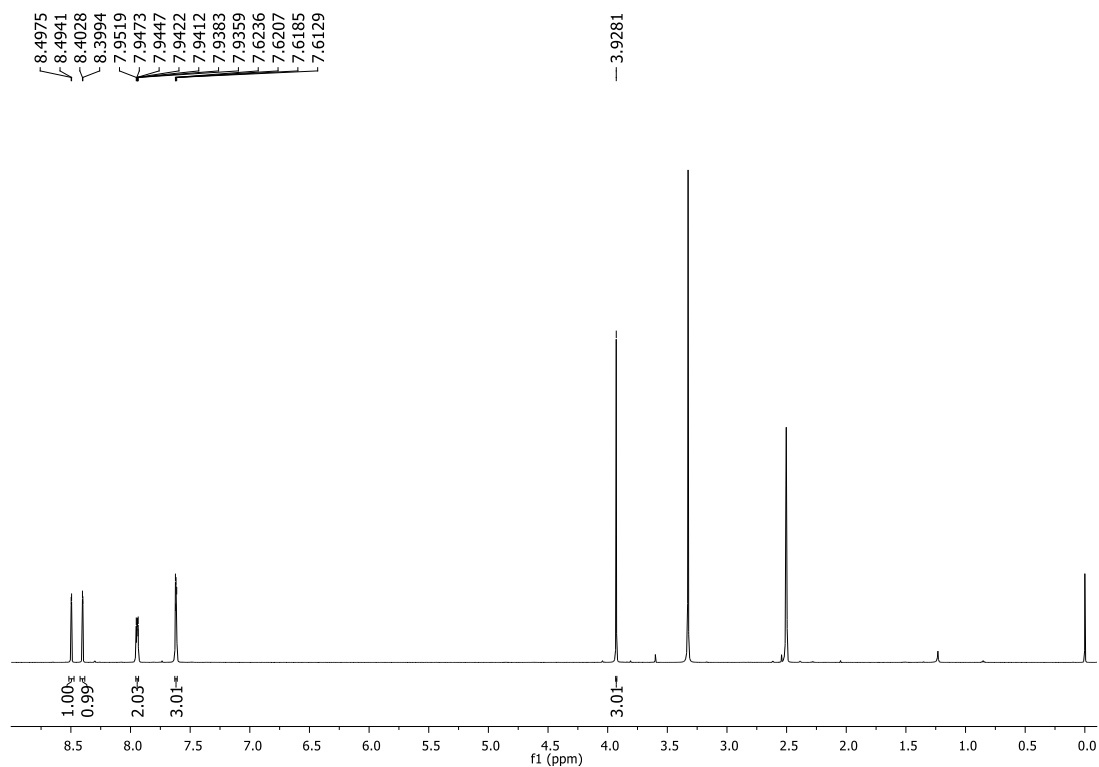

**Figure S7.** <sup>1</sup>H NMR spectrum (DMSO-*d*<sub>6</sub>, 600 MHz) of 6-bromo-3-methyl-2-phenyl-3*H*-imidazo[4,5-*b*]pyridine **6**

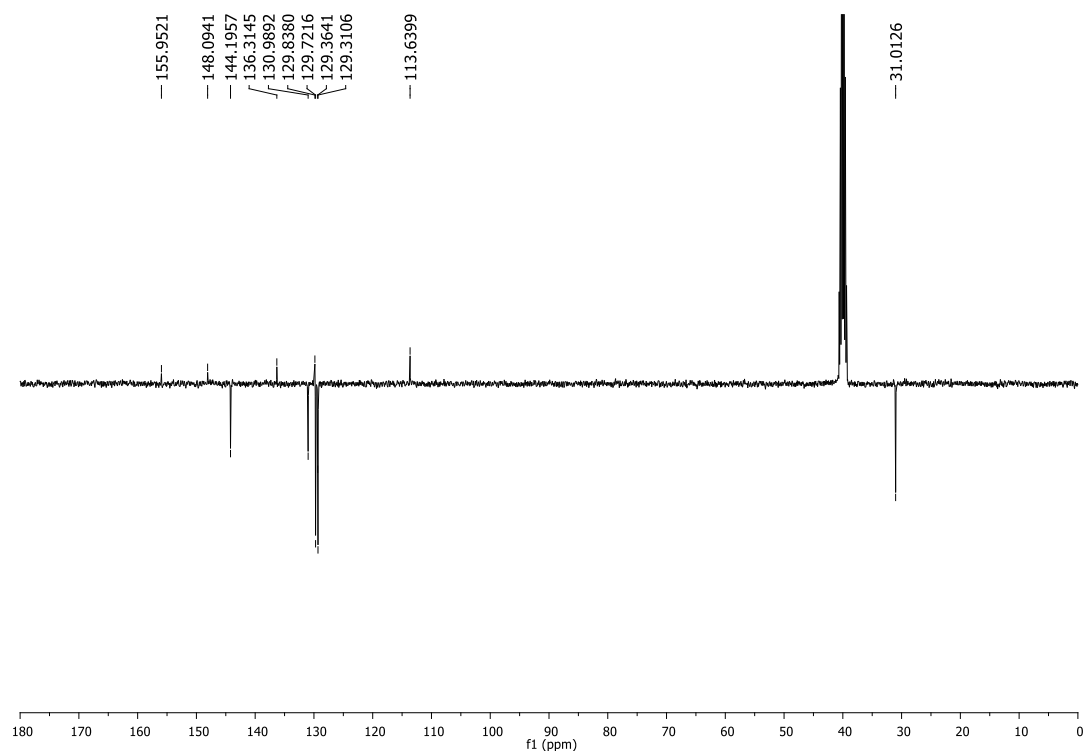

**Figure S8.** <sup>13</sup>C NMR spectrum (DMSO-*d*<sub>6</sub>, 101 MHz) of 6-bromo-3-methyl-2-phenyl-3*H*-imidazo[4,5-*b*]pyridine **6**

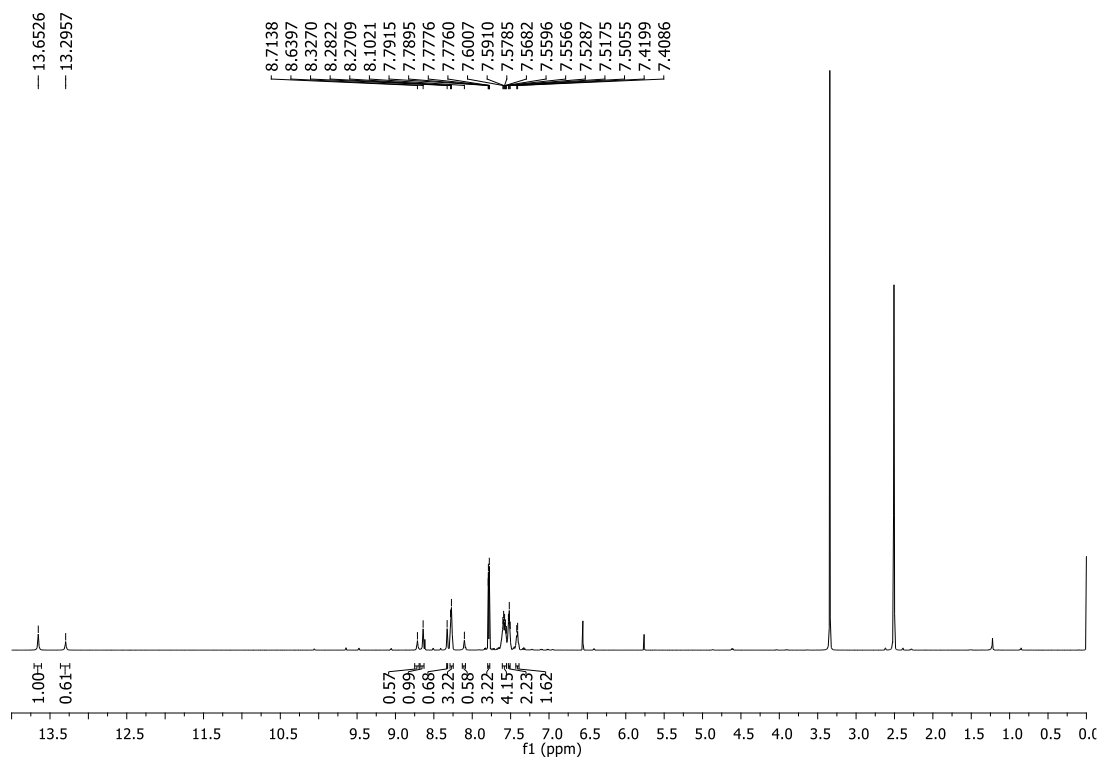

**Figure S9.** <sup>1</sup>H NMR spectrum (DMSO-*d*<sub>6</sub>, 600 MHz) of 2,6-diphenyl-3*H*-imidazo[4,5-*b*]pyridine **12**

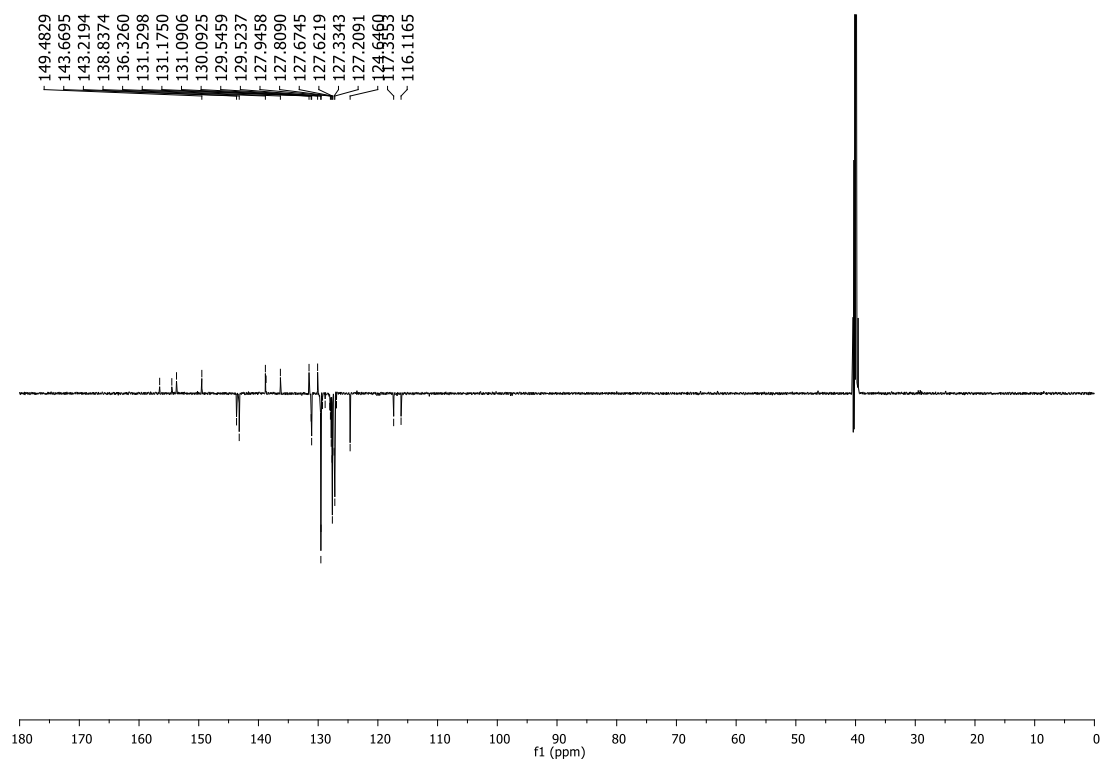

**Figure S10.** <sup>13</sup>C NMR spectrum (DMSO-*d*<sub>6</sub>, 151 MHz) of 2,6-diphenyl-3*H*-imidazo[4,5-*b*]pyridine **12**

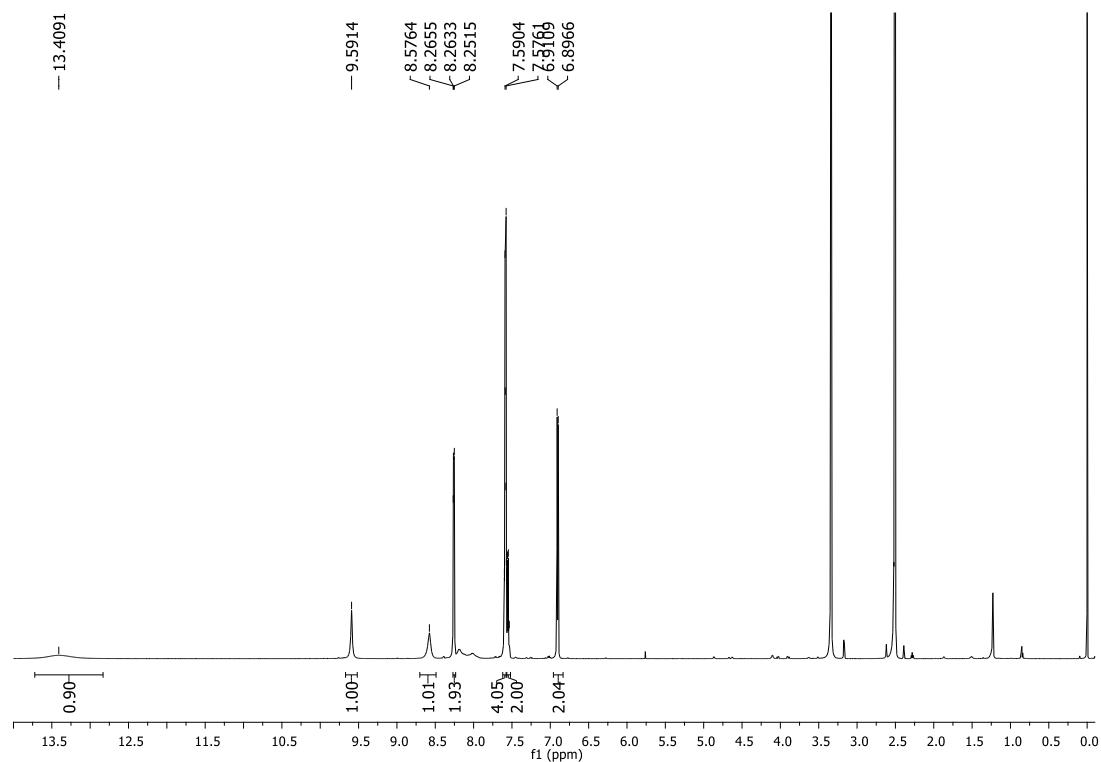

**Figure S11.** <sup>1</sup>H NMR spectrum (DMSO-*d*<sub>6</sub>, 600 MHz) of 4-(2-phenyl-3*H*-imidazo[4,5-*b*]pyridin-6-yl)phenol **13**

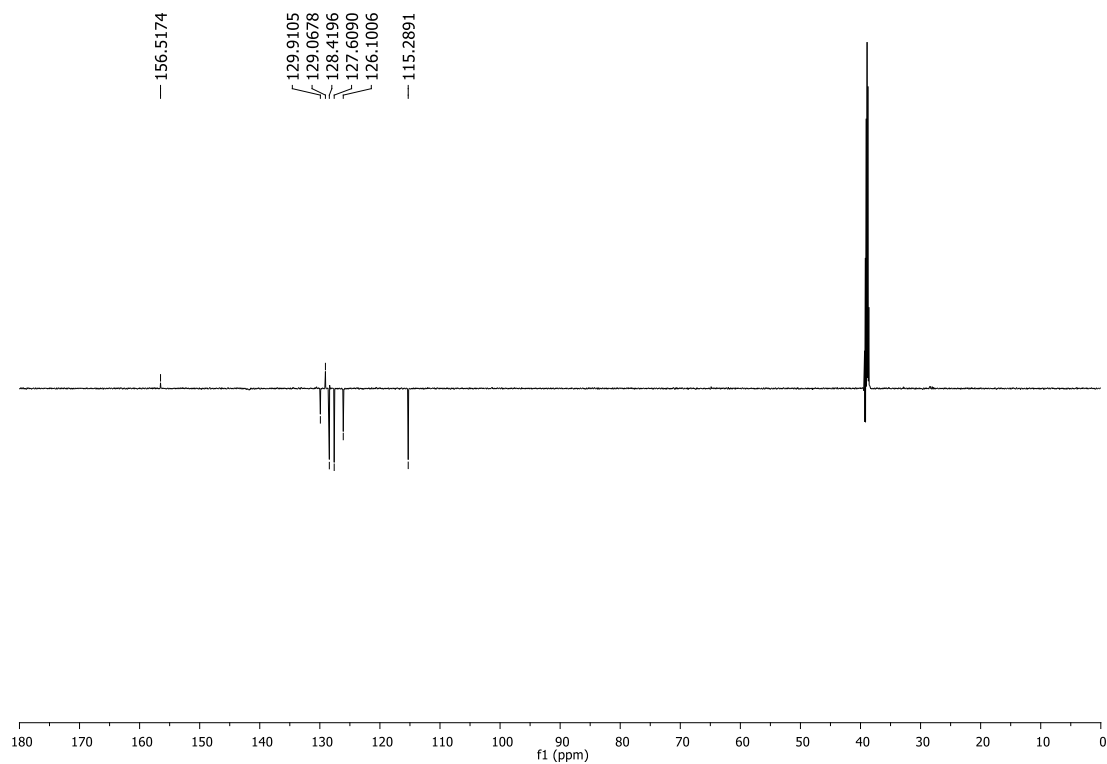

**Figure S12.** <sup>13</sup>C NMR spectrum (DMSO-*d*<sub>6</sub>, 151 MHz) of 4-(2-phenyl-3*H*-imidazo[4,5-*b*]pyridin-6-yl)phenol **13**

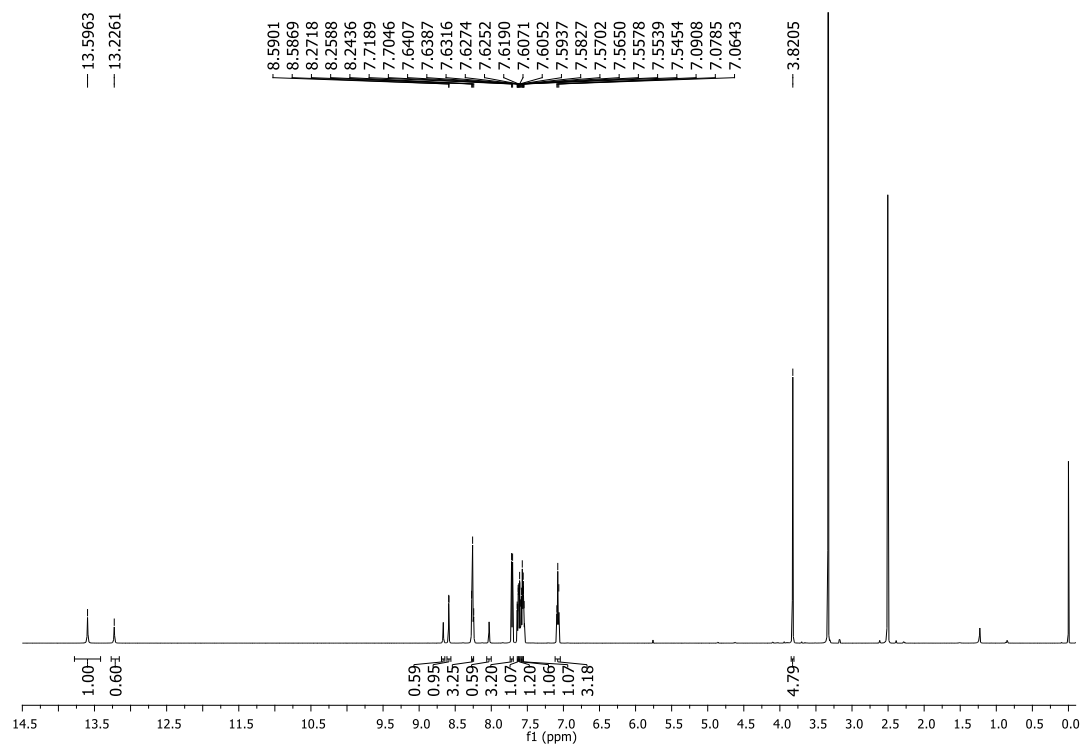

**Figure S13.** <sup>1</sup>H NMR spectrum (DMSO-*d*<sub>6</sub>, 600 MHz) of 6-(4-methoxyphenyl)-2-phenyl-3H-imidazo[4,5-*b*]pyridine **14**

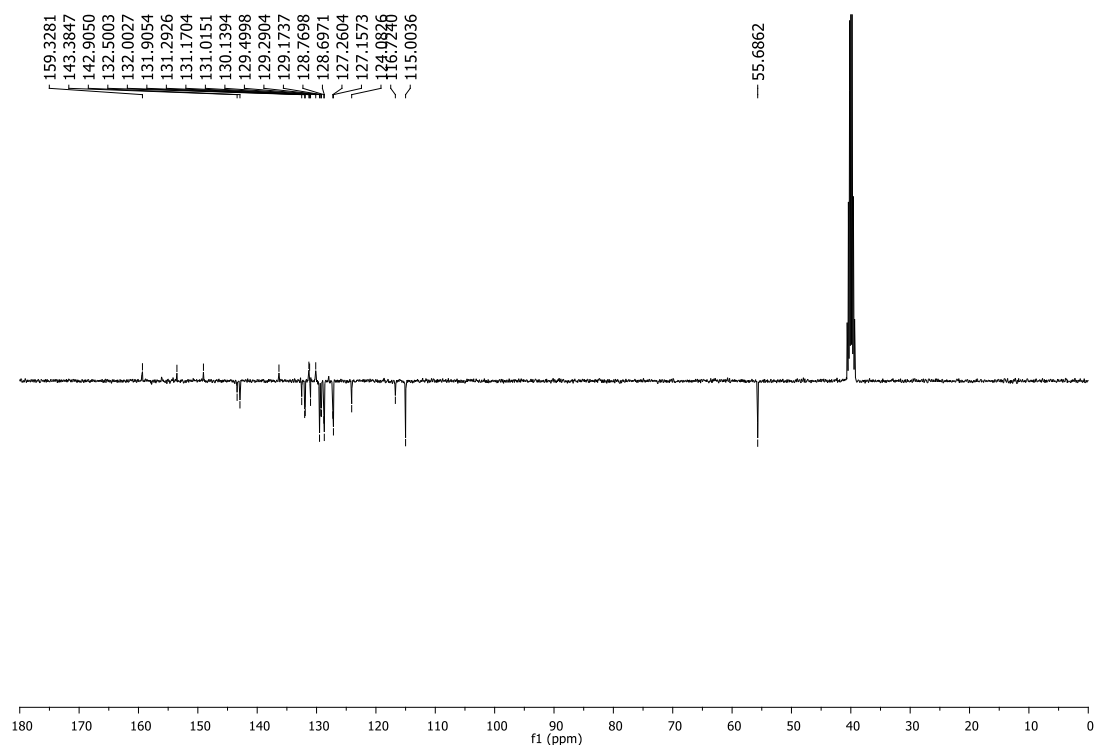

**Figure S14.** <sup>13</sup>C NMR spectrum (DMSO-*d*<sub>6</sub>, 101 MHz) of 6-(4-methoxyphenyl)-2-phenyl-3H-imidazo[4,5-*b*]pyridine **14**



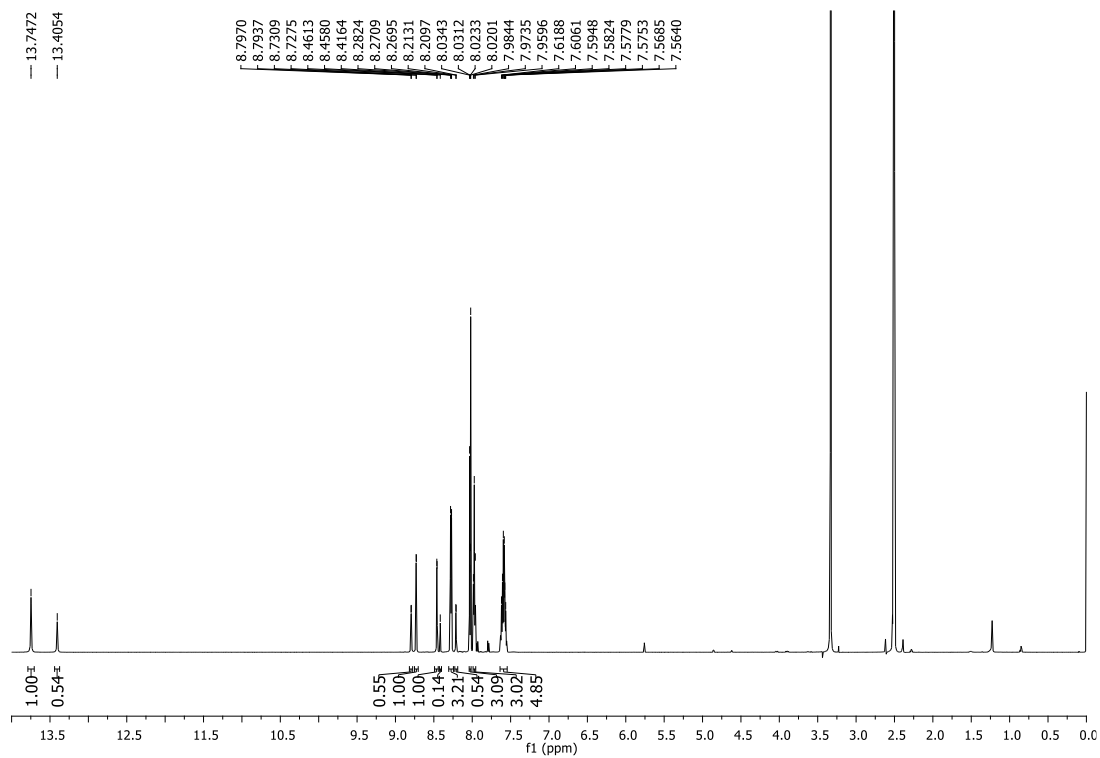

**Figure S15.**  $^1\text{H}$  NMR spectrum ( $\text{DMSO-}d_6$ , 600 MHz) of 4-(2-phenyl-3*H*-imidazo[4,5-*b*]pyridin-6-yl)benzonitrile **15**

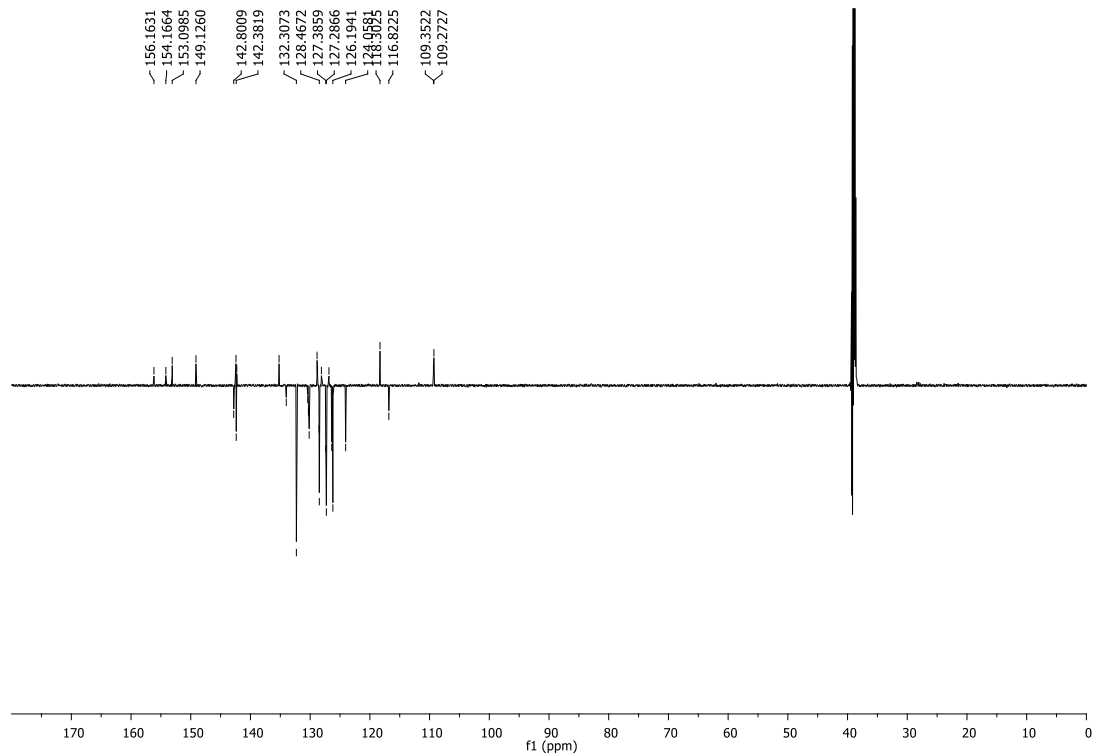

**Figure S16.**  $^{13}\text{C}$  NMR spectrum ( $\text{DMSO-}d_6$ , 151 MHz) of 4-(2-phenyl-3*H*-imidazo[4,5-*b*]pyridin-6-yl)benzonitrile **15**

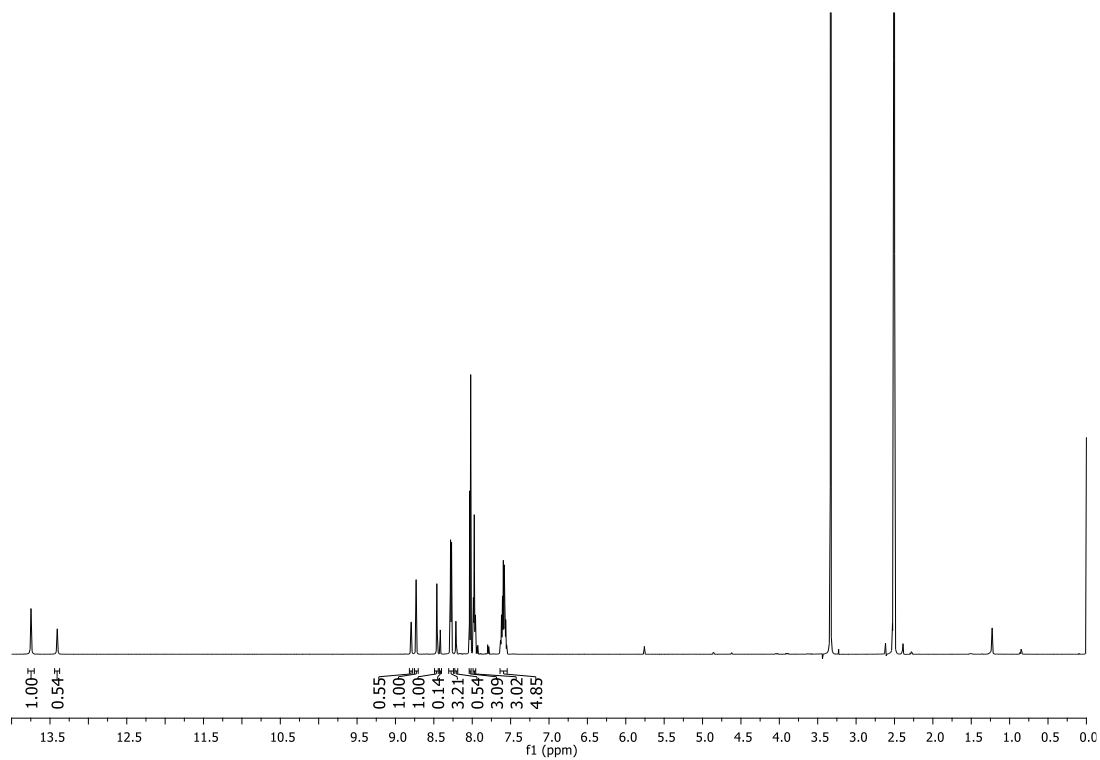

**Figure S17.** <sup>1</sup>H NMR spectrum (DMSO-*d*<sub>6</sub>, 600 MHz) of 6-(4-nitrophenyl)-2-phenyl-3*H*-imidazo[4,5-*b*]pyridine **16**

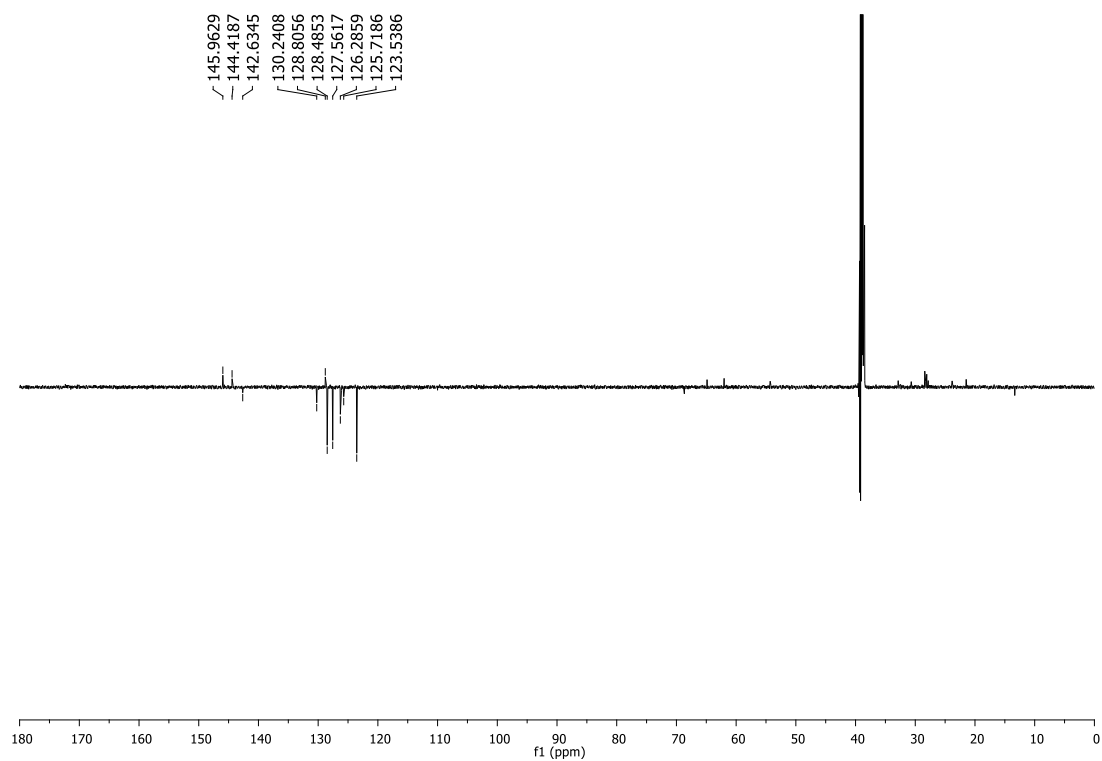

**Figure S18.** <sup>13</sup>C NMR spectrum (DMSO-*d*<sub>6</sub>, 151 MHz) of 6-(4-nitrophenyl)-2-phenyl-3*H*-imidazo[4,5-*b*]pyridine **16**

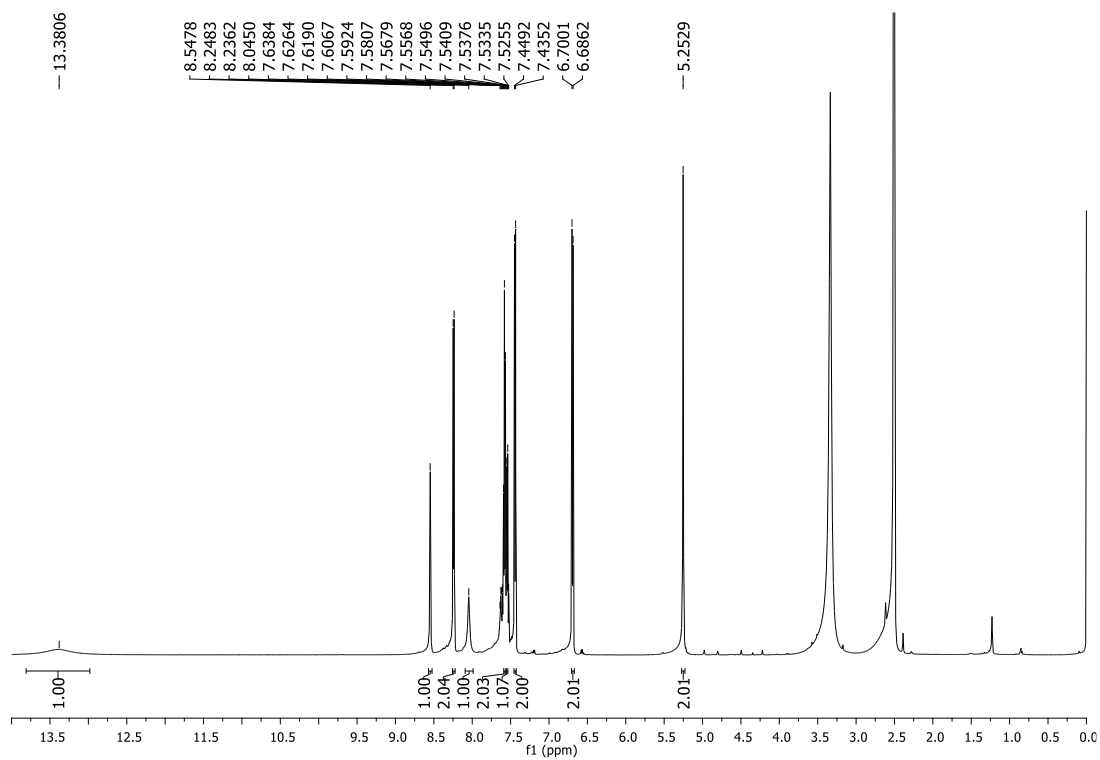

**Figure S19.**  $^1\text{H}$  NMR spectrum (DMSO- $d_6$ , 600 MHz) of 4-(2-phenyl-3*H*-imidazo[4,5-*b*]pyridin-6-yl)aniline **17**

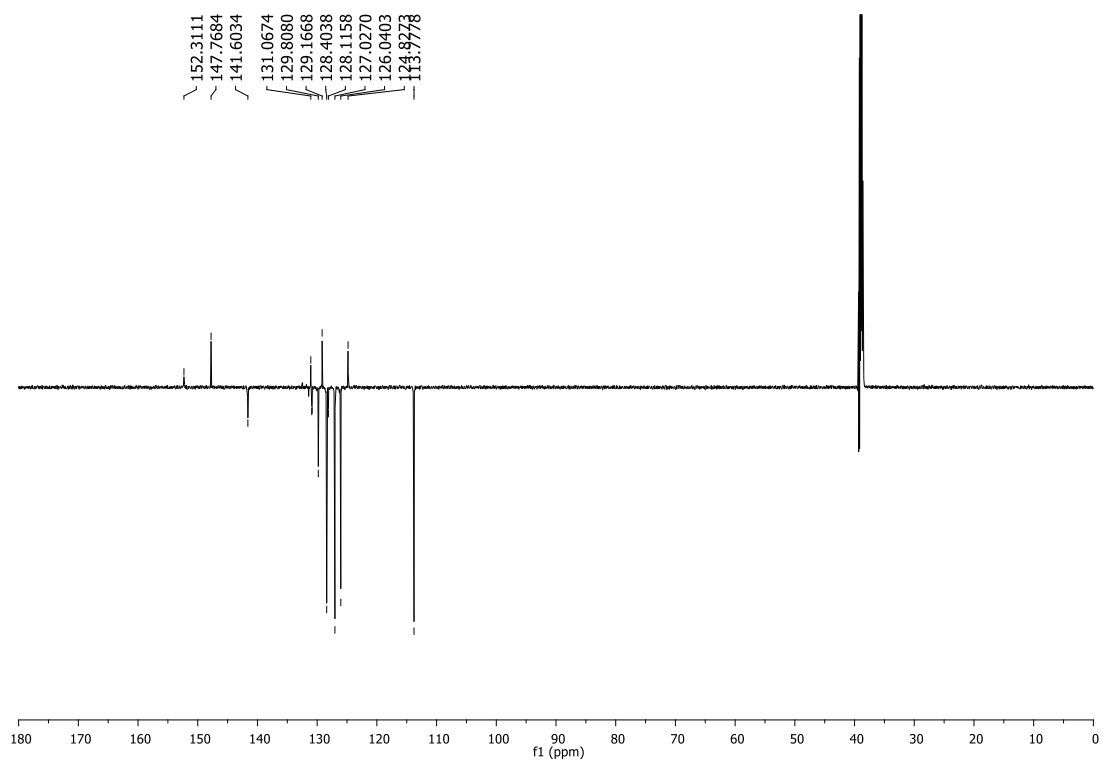

**Figure S20.**  $^{13}\text{C}$  NMR spectrum (DMSO- $d_6$ , 151 MHz) of 4-(2-phenyl-3*H*-imidazo[4,5-*b*]pyridin-6-yl)aniline **17**

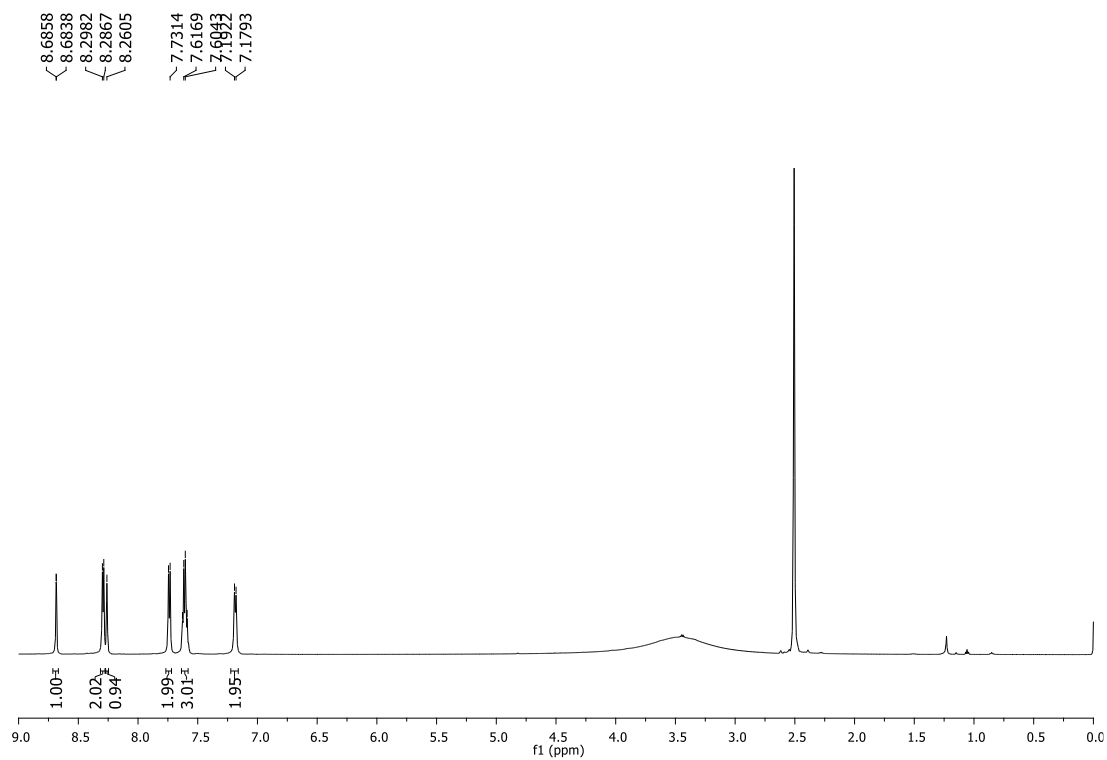

**Figure S21.** <sup>1</sup>H NMR spectrum (DMSO-*d*<sub>6</sub>, 600 MHz) of 4-(2-phenyl-3*H*-imidazo[4,5-*b*]pyridin-6-yl)aniline hydrochloride **18**

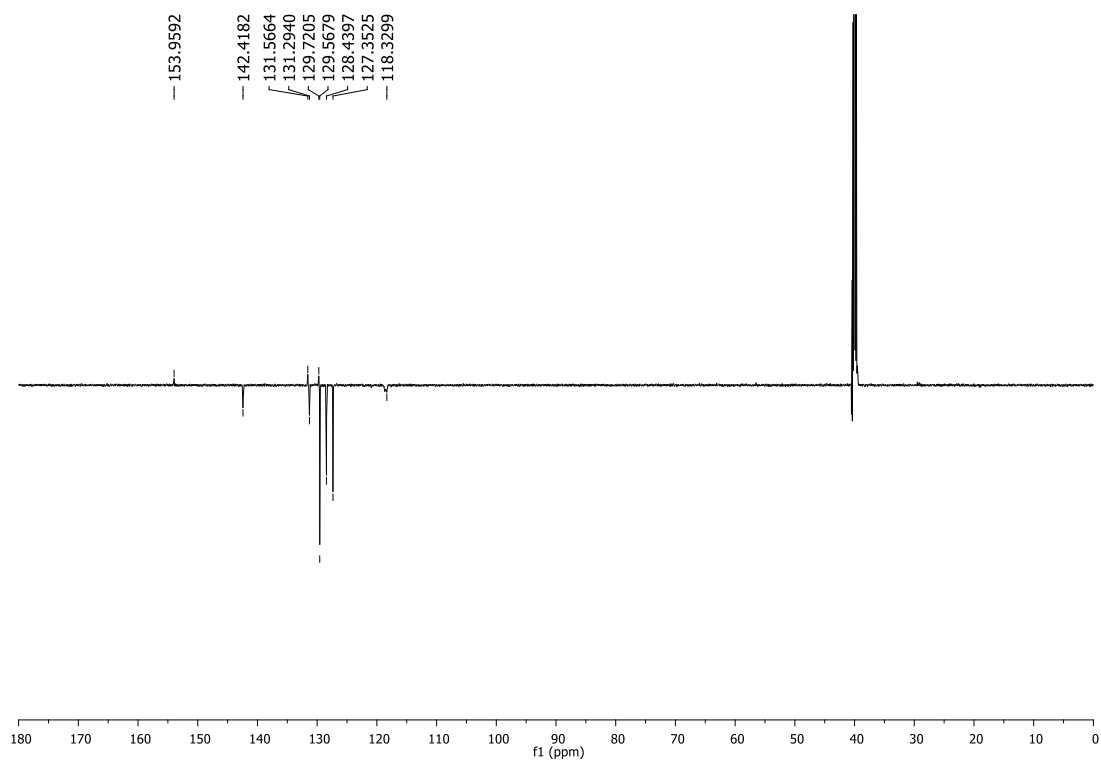

**Figure S22.** <sup>13</sup>C NMR spectrum (DMSO-*d*<sub>6</sub>, 151 MHz) of 4-(2-phenyl-3*H*-imidazo[4,5-*b*]pyridin-6-yl)aniline hydrochloride **18**

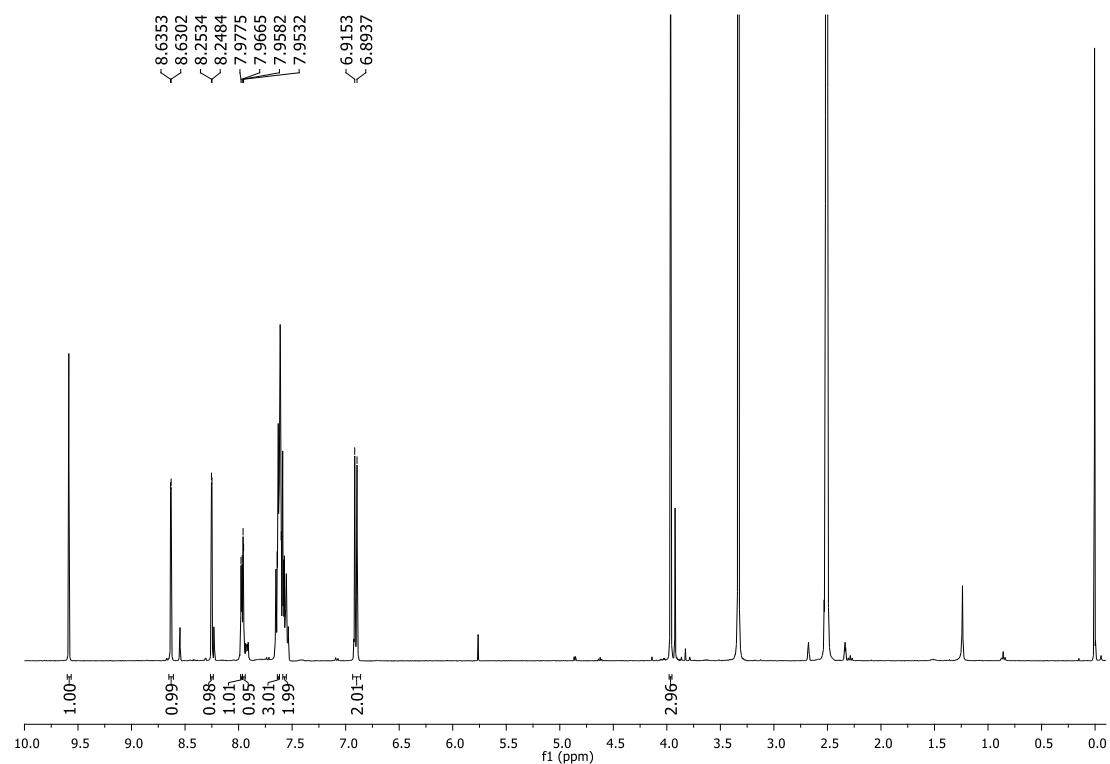

**Figure S23.**  $^1\text{H}$  NMR spectrum (DMSO- $d_6$ , 400 MHz) of 4-(3-methyl-2-phenyl-3*H*-imidazo[4,5-*b*]pyridin-6-yl)phenol **19**

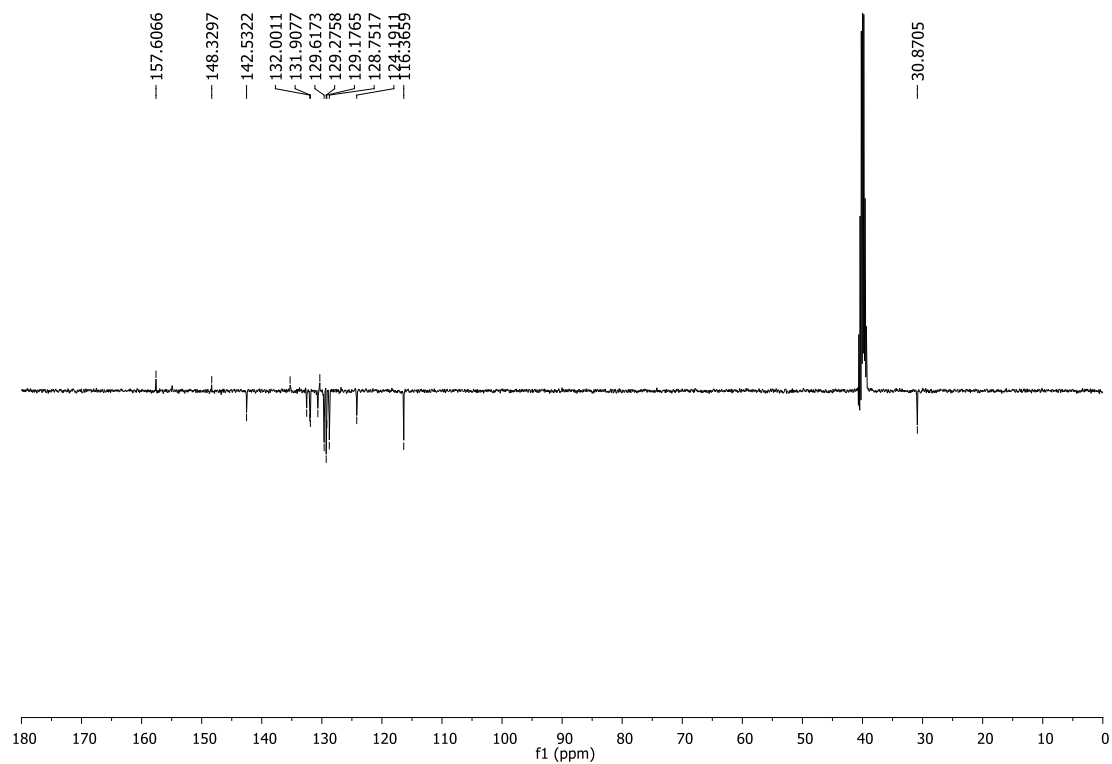

**Figure S24.**  $^{13}\text{C}$  NMR spectrum (DMSO- $d_6$ , 101 MHz) of 4-(3-methyl-2-phenyl-3*H*-imidazo[4,5-*b*]pyridin-6-yl)phenol **19**

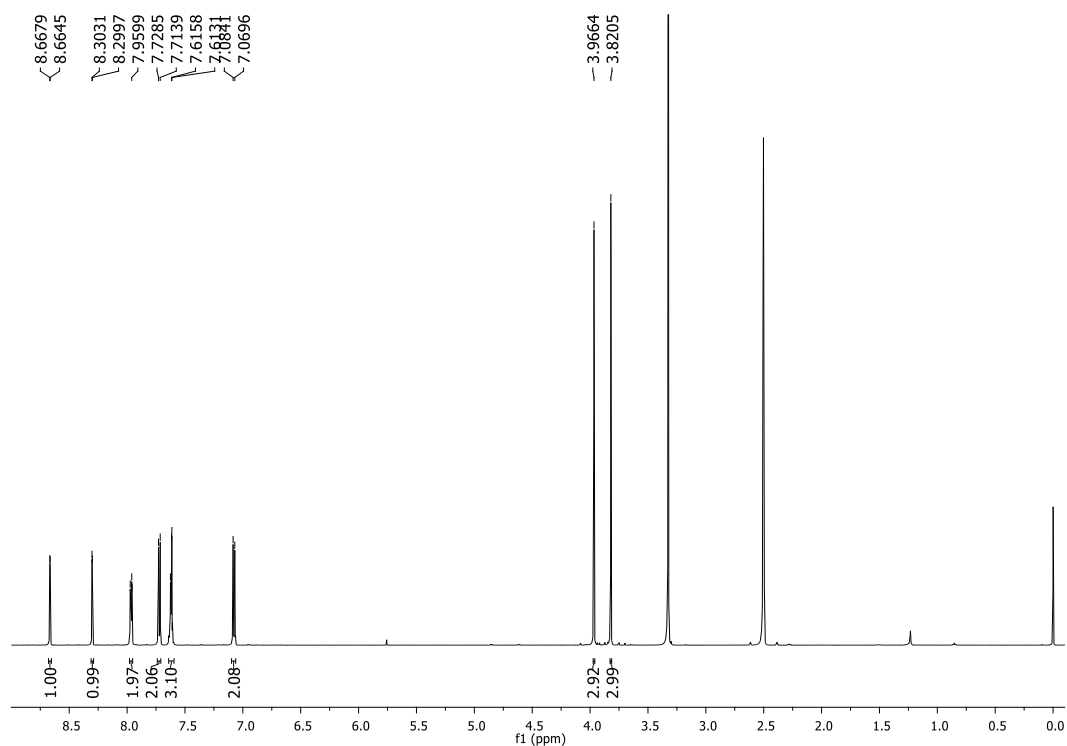

**Figure S25.** <sup>1</sup>H NMR spectrum (DMSO-*d*<sub>6</sub>, 600 MHz) of 6-(4-methoxyphenyl)-3-methyl-2-phenyl-3*H*-imidazo[4,5-*b*]pyridine **20**

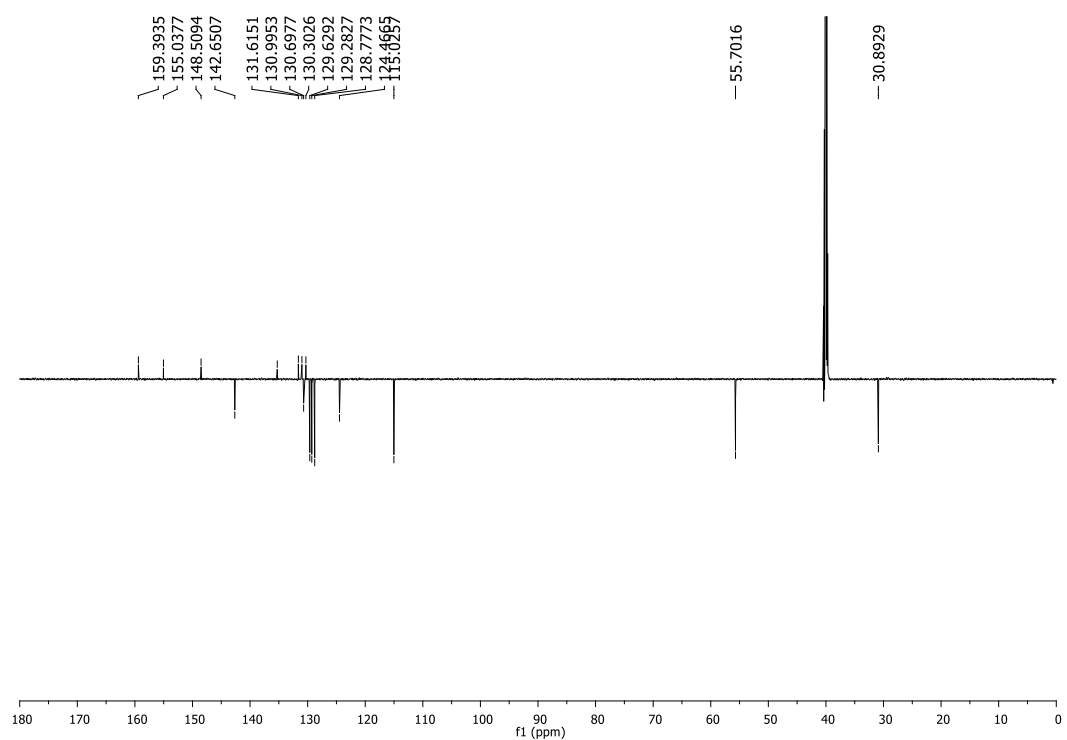

**Figure S26.** <sup>13</sup>C NMR spectrum (DMSO-*d*<sub>6</sub>, 151 MHz) of 6-(4-methoxyphenyl)-3-methyl-2-phenyl-3*H*-imidazo[4,5-*b*]pyridine **20**

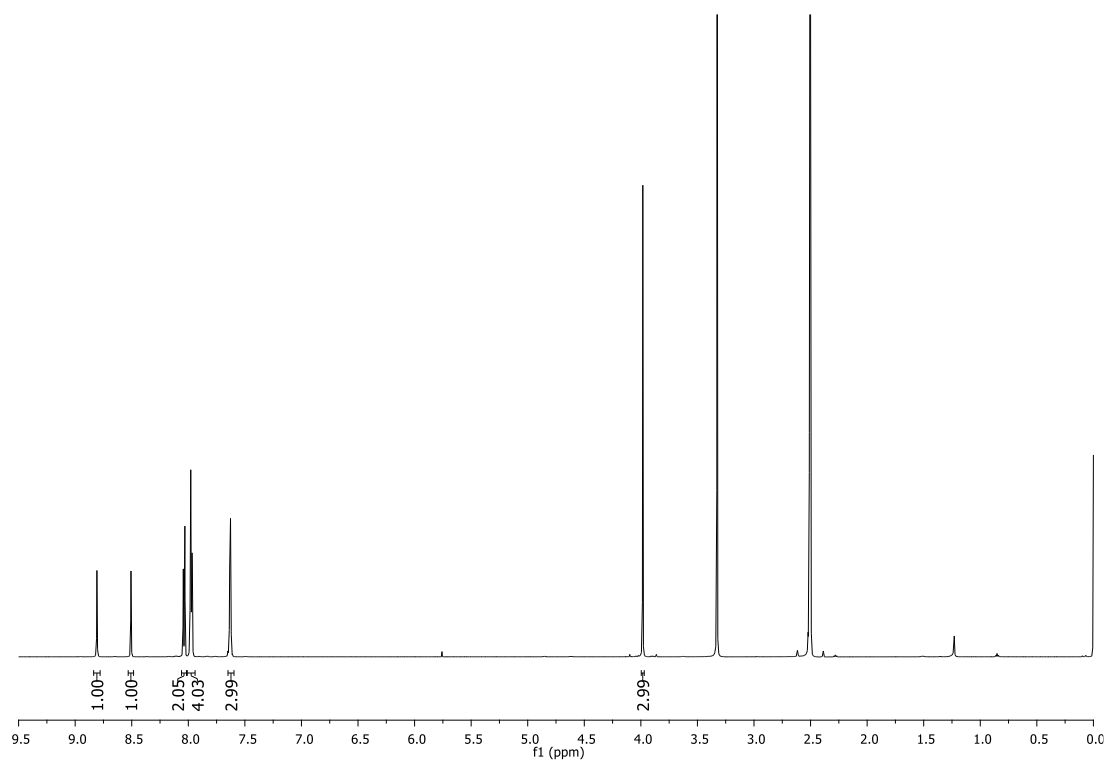

**Figure S27.** <sup>1</sup>H NMR spectrum (DMSO-*d*<sub>6</sub>, 600 MHz) of 4-(3-methyl-2-phenyl-3*H*-imidazo[4,5-*b*]pyridin-6-yl)benzonitrile **21**

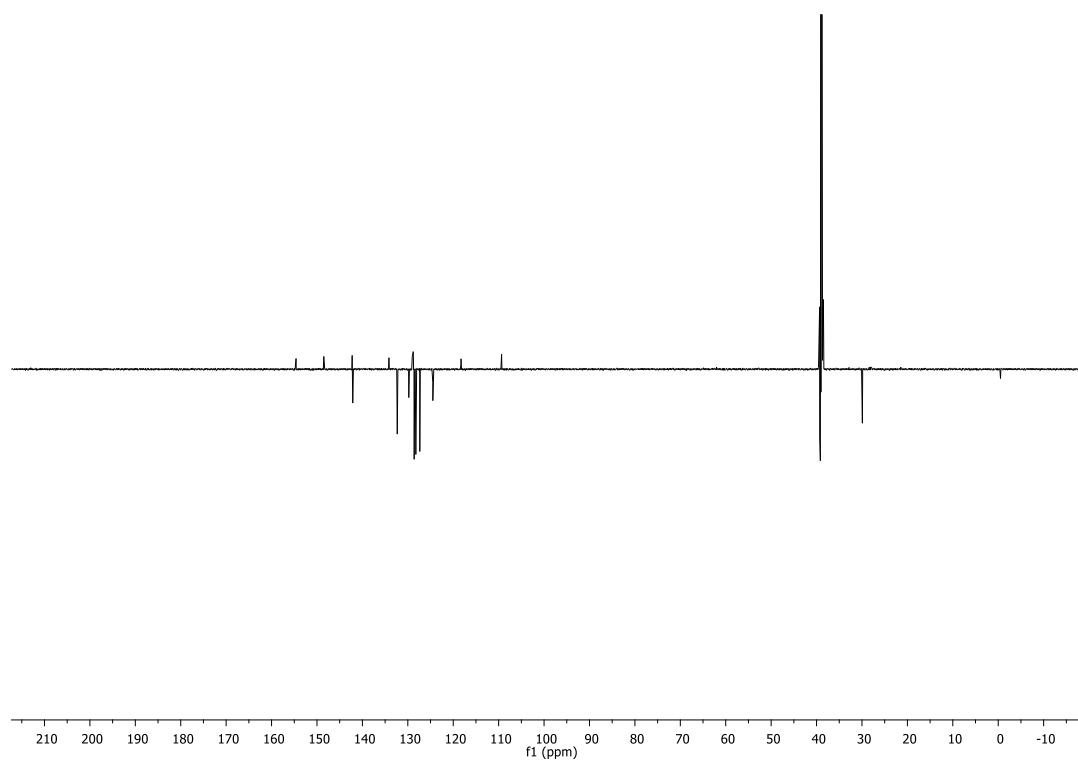

**Figure S28.** <sup>13</sup>C NMR spectrum (DMSO-*d*<sub>6</sub>, 151 MHz) of 4-(3-methyl-2-phenyl-3*H*-imidazo[4,5-*b*]pyridin-6-yl)benzonitrile **21**

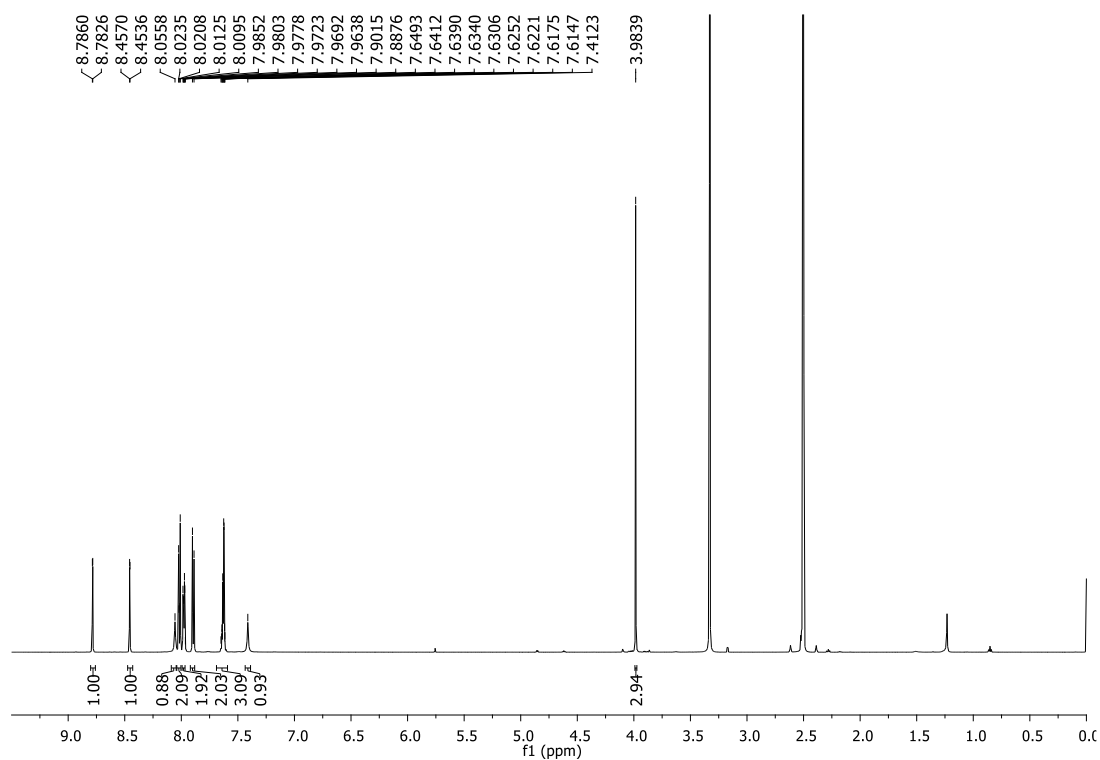

**Figure S29.** <sup>1</sup>H NMR spectrum (DMSO-*d*<sub>6</sub>, 600 MHz) of 4-(3-methyl-2-phenyl-3*H*-imidazo[4,5-*b*]pyridin-6-yl)benzamide **22**

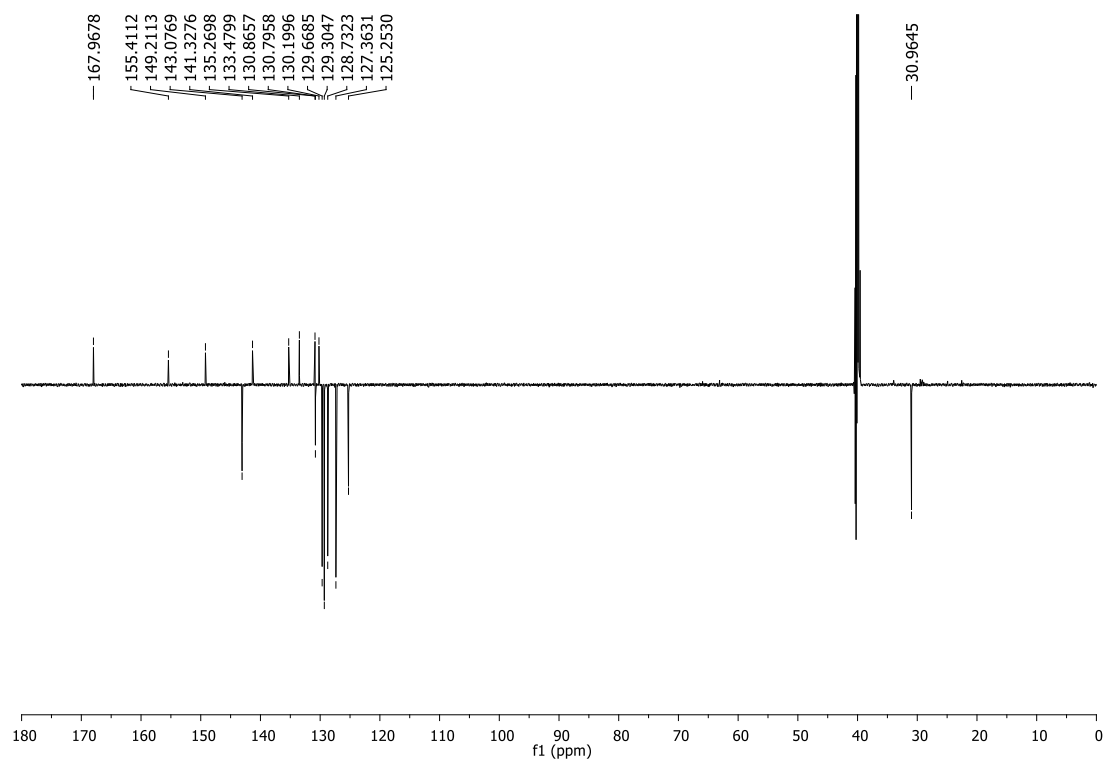

**Figure S30.** <sup>13</sup>C NMR spectrum (DMSO-*d*<sub>6</sub>, 151 MHz) of 4-(3-methyl-2-phenyl-3*H*-imidazo[4,5-*b*]pyridin-6-yl)benzamide **22**



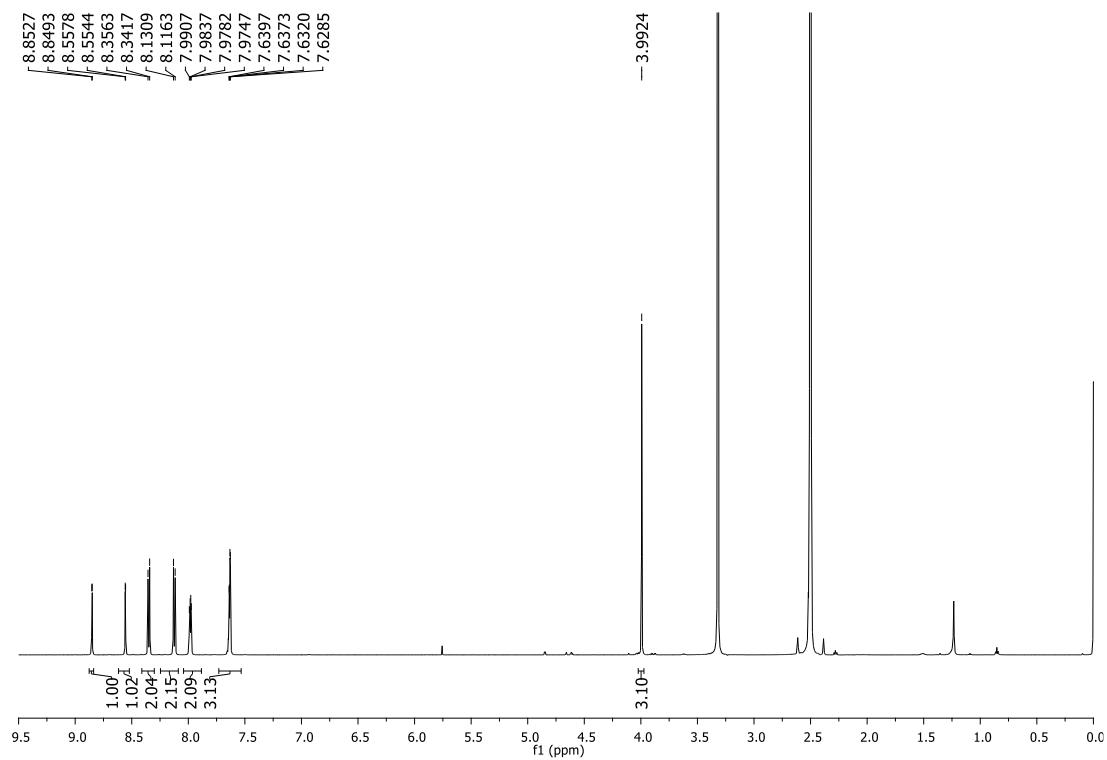

**Figure S31.** <sup>1</sup>H NMR spectrum (DMSO-*d*<sub>6</sub>, 600 MHz) of 3-methyl-6-(4-nitrophenyl)-2-phenyl-3*H*-imidazo[4,5-*b*]pyridine **23**

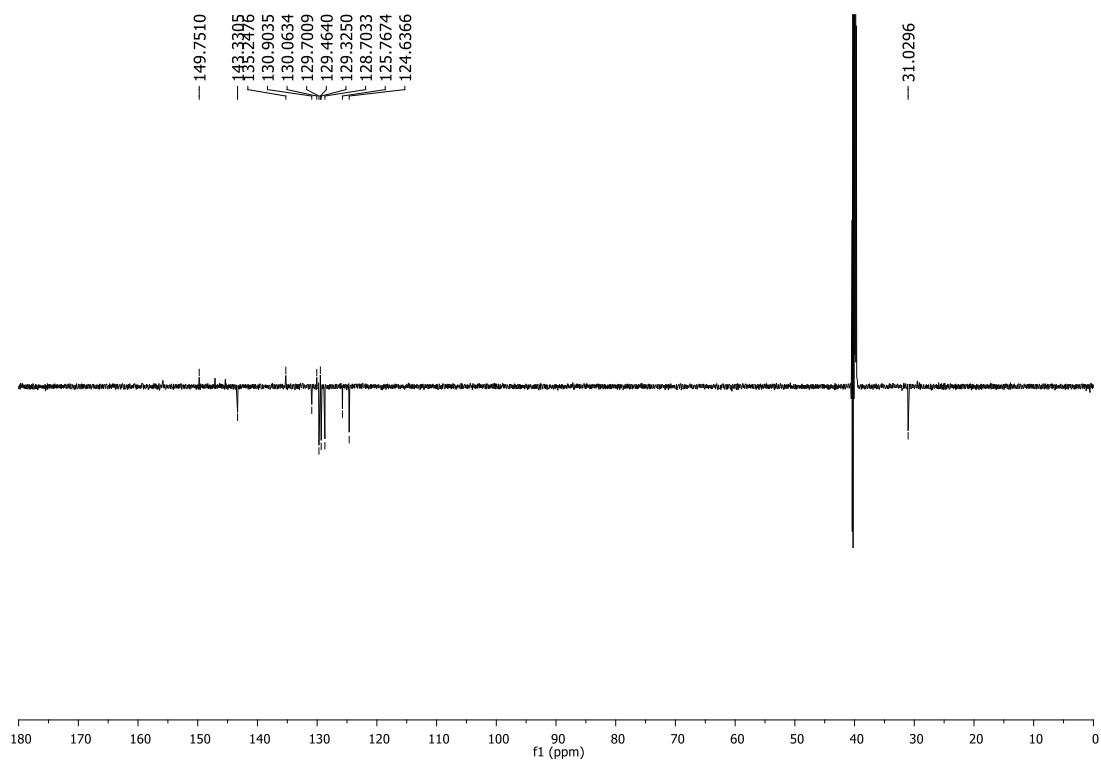

**Figure S32.** <sup>13</sup>C NMR spectrum (DMSO-*d*<sub>6</sub>, 151 MHz) of 3-methyl-6-(4-nitrophenyl)-2-phenyl-3*H*-imidazo[4,5-*b*]pyridine **23**

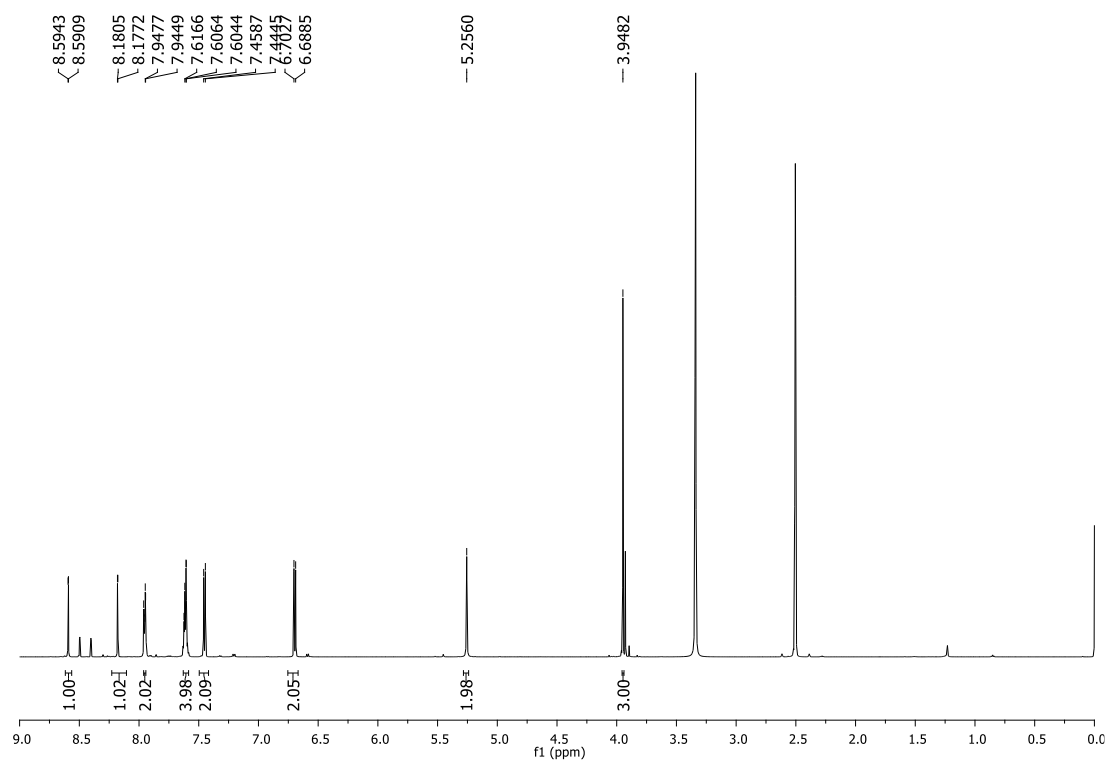

**Figure S33.**  $^1\text{H}$  NMR spectrum ( $\text{DMSO-}d_6$ , 600 MHz) of 4-(3-methyl-2-phenyl-3*H*-imidazo[4,5-*b*]pyridin-6-yl)aniline **24**

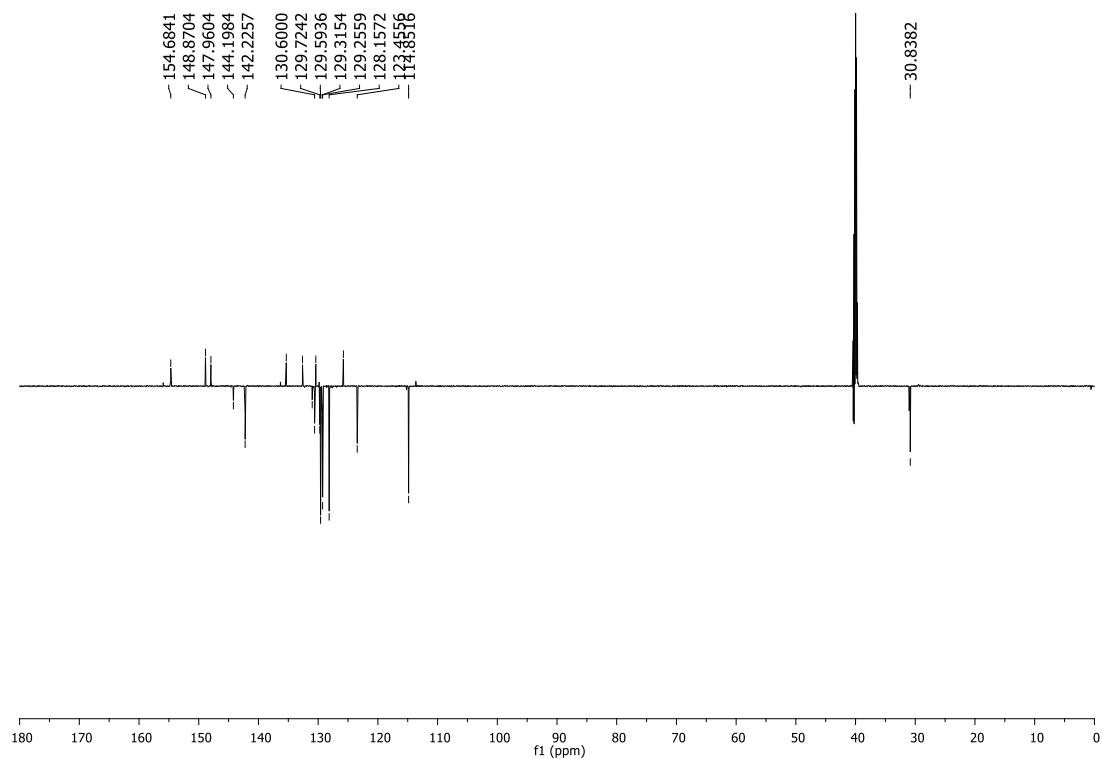

**Figure S34.**  $^{13}\text{C}$  NMR spectrum ( $\text{DMSO-}d_6$ , 151 MHz) of 4-(3-methyl-2-phenyl-3*H*-imidazo[4,5-*b*]pyridin-6-yl)aniline **24**

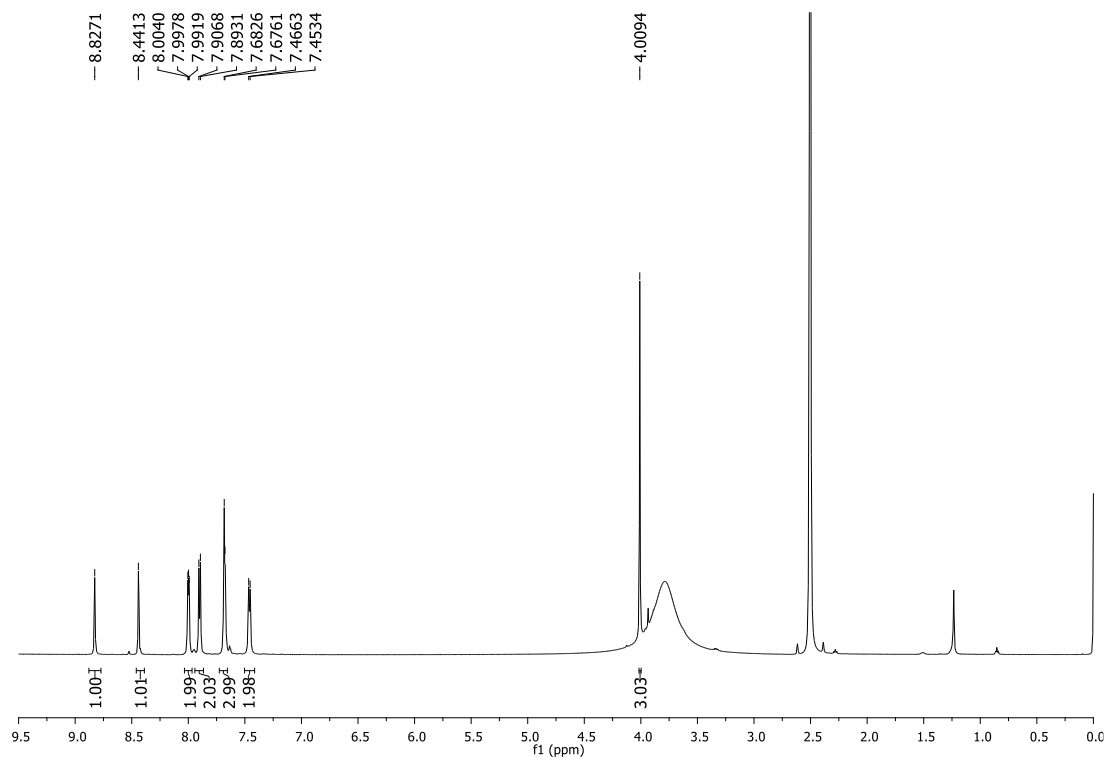

**Figure S35.**  $^1\text{H}$  NMR spectrum ( $\text{DMSO-}d_6$ , 600 MHz) of 4-(3-methyl-2-phenyl-3*H*-imidazo[4,5-*b*]pyridin-6-yl)aniline hydrochloride **25**

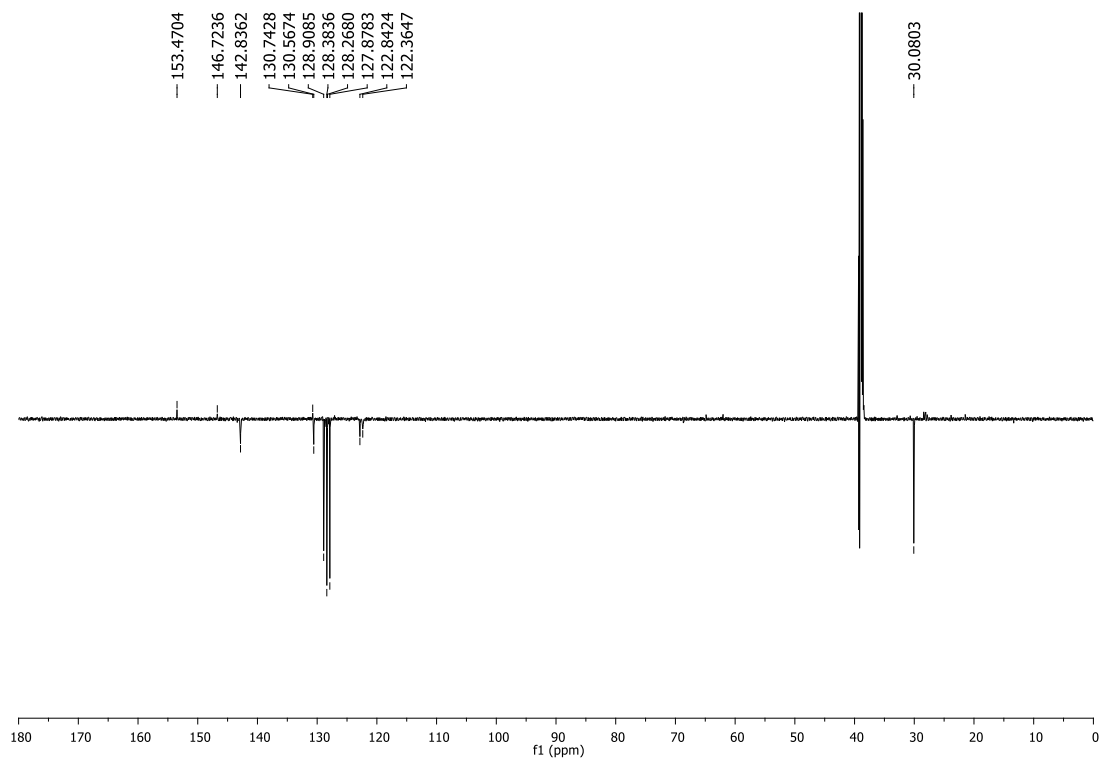

**Figure S36.**  $^{13}\text{C}$  NMR spectrum ( $\text{DMSO-}d_6$ , 151 MHz) of 4-(3-methyl-2-phenyl-3*H*-imidazo[4,5-*b*]pyridin-6-yl)aniline hydrochloride **25**

a)

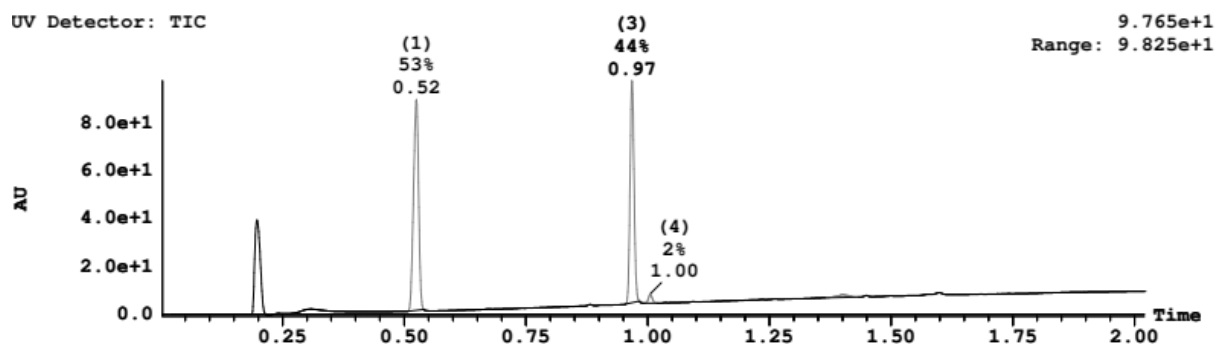

b)

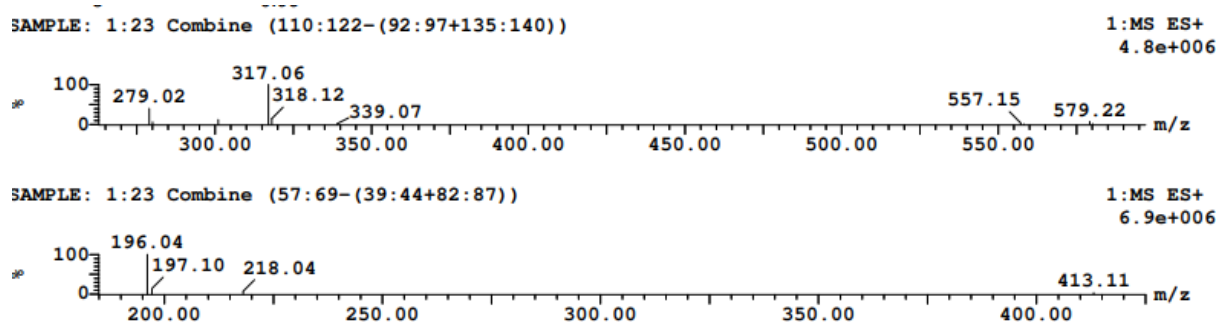

**Figure S37.** a) chromatogram b) mass spectrum of compounds isolated from second reaction mixture

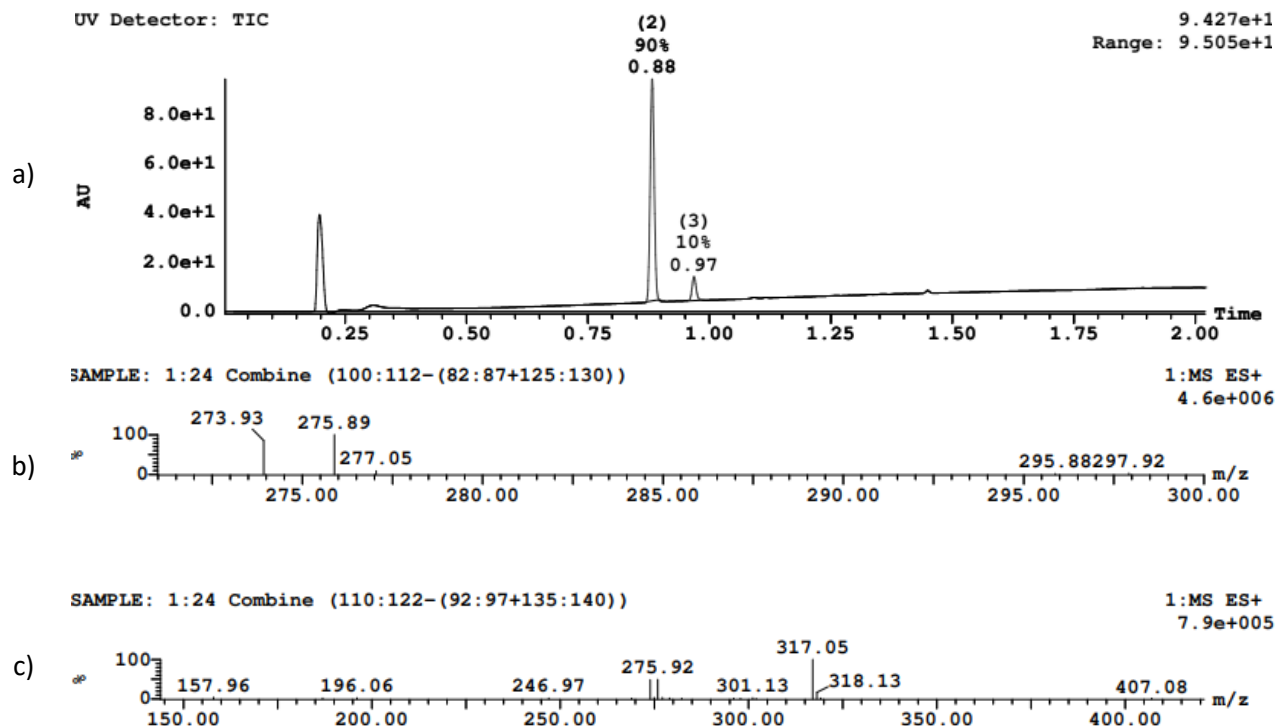

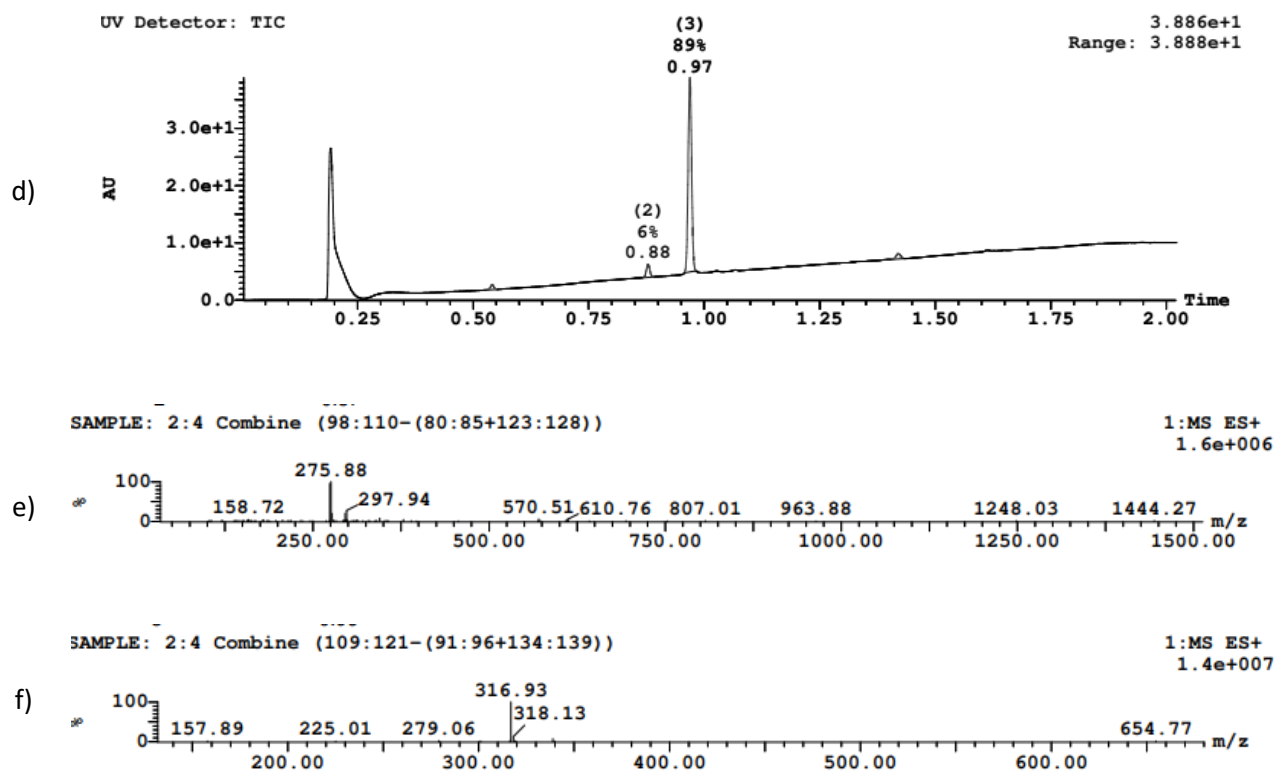

**Figure 38** a) chromatogram b) mass spectrum of compounds isolated from third (a,b,c) and seventh (d,e,f) reaction mixture
